# Supplementary material for: The weaker-binding Fc γ receptor IIIa F158 allotype retains sensitivity to N-glycan composition and exhibits a destabilized antibody-binding interface
Source: PubMed Central journal article supplement (PMC9436803; doi:10.1016/j.jbc.2022.102329), 2022-07-31

Supporting Information for:

The weaker-binding Fc  $\gamma$  receptor IIIa F158 allotype retains sensitivity to N-glycan composition and exhibits a destabilized antibody-binding interface

Paul G. Kremer<sup>1</sup> and Adam W. Barb<sup>1,2,3</sup>

**Supplemental Table 1.** N162 glycan composition of CD16a expressed in HEK293F cells

| Allotype | Glycan                | MS2 | z | Calc (M+zH) <sup>2+</sup> | Obs (M+zH) <sup>2+</sup> | Intensity (arb) | RT | PPM error | Mass error (Da) | Peptide       |
|----------|-----------------------|-----|---|---------------------------|--------------------------|-----------------|----|-----------|-----------------|---------------|
| F        | HexNAc(5)Hex(5)Fuc(1) | X   | 3 | 927.0392                  | 927.0381                 | 2500            | 9  | 1.230     | 0.00114         | GSKNVSSE      |
| F        | HexNAc(5)Hex(4)Fuc(1) | X   | 3 | 873.0216                  | 873.0211                 | 5300            | 9  | 0.607     | 0.00053         | GSKNVSSE      |
| F        | HexNAc(5)Hex(3)Fuc(1) | X   | 3 | 819.0040                  | 819.0026                 | 2500            | 9  | 1.734     | 0.00142         | GSKNVSSE      |
| V        | HexNAc(5)Hex(5)Fuc(1) | X   | 3 | 960.0620                  | 960.0625                 | 103000          | 11 | -0.479    | 0.00046         | VGSKNVSSE     |
| V        | HexNAc(5)Hex(4)Fuc(1) | X   | 3 | 906.0444                  | 906.0444                 | 377000          | 11 | 0.033     | 3E-05           | VGSKNVSSE     |
| V        | HexNAc(5)Hex(3)Fuc(1) | X   | 3 | 852.0268                  | 852.0268                 | 182000          | 11 | 0.023     | 2E-05           | VGSKNVSSE     |
| V        | HexNAc(4)Hex(3)Fuc(1) | X   | 3 | 784.3337                  | 784.3337                 | 240000          | 10 | 0.000     | 0               | VGSKNVSSE     |
| V        | HexNAc(2)Hex(5)       | X   | 3 | 870.3758                  | 870.3763                 | 117000          | 15 | -0.574    | 0.0005          | CRGLVGSKNVSSE |
| V        | HexNAc(6)Hex(3)Fuc(1) | X   | 3 | 919.7200                  | 919.7196                 | 220000          | 10 | 0.381     | 0.00035         | VGSKNVSSE     |
| V        | HexNAc(3)Hex(3)Fuc(1) | X   | 2 | 1074.4572                 | 1074.4572                | 150000          | 10 | 0.019     | 2E-05           | VGSKNVSSE     |
| V        | HexNAc(4)Hex(5)Fuc(1) | X   | 3 | 892.3689                  | 892.3685                 | 296000          | 10 | 0.471     | 0.00042         | VGSKNVSSE     |
| V        | HexNAc(4)Hex(4)Fuc(1) | X   | 3 | 838.3513                  | 838.3509                 | 215000          | 10 | 0.489     | 0.00041         | VGSKNVSSE     |
| V        | HexNAc(5)Hex(6)Fuc(1) | X   | 3 | 1014.0797                 | 1014.0799                | 100000          | 9  | -0.247    | 0.00025         | VGSKNVSSE     |

**Supplemental Table 2.** CD16a affinities relative to the complex-type glycoform

|      | Complex-type | Man5 | (1)GlcNAc | S164A |
|------|--------------|------|-----------|-------|
| V158 | 1.0          | 3.4  | 13        | 1.1   |
| F158 | 1.0          | 1.6  | 13        | 1.1   |

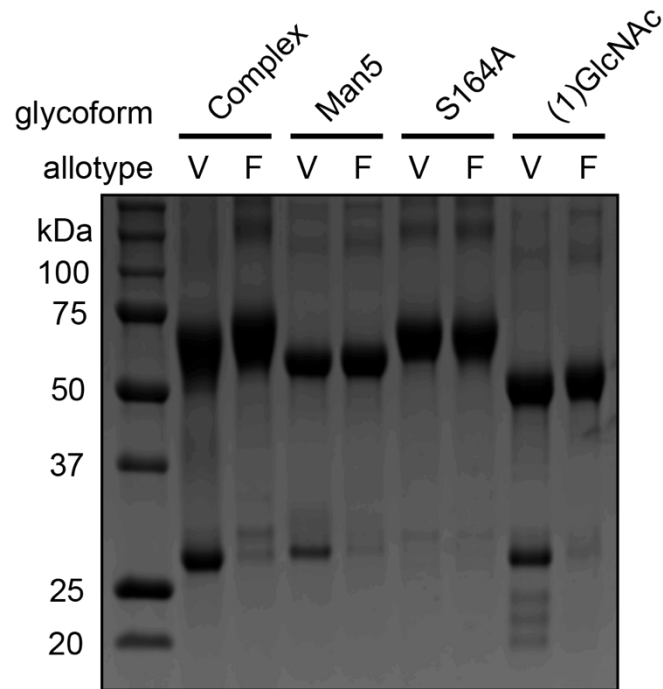

**Supplemental Figure 1.** SDS-PAGE of GFP-srCD16a fusions. The two different allotypes are expressed with four different glycosylation patterns. Distinct shifts in migration are observed between each type of glycosylated protein.

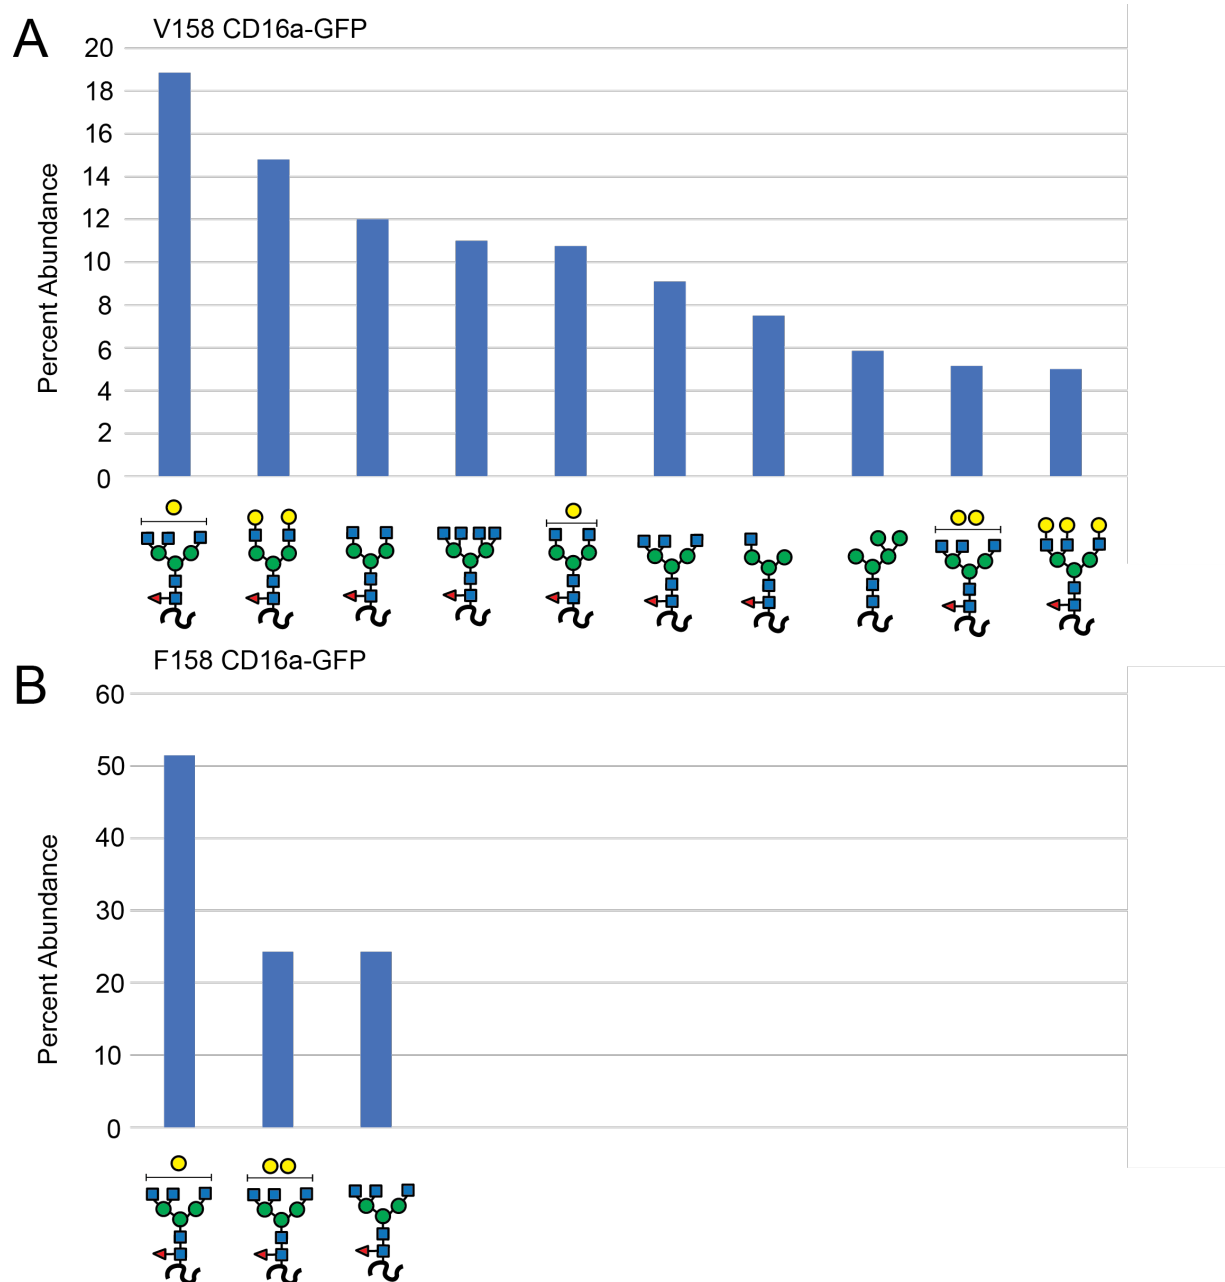

**Supplemental Figure 2.** Relative abundance of N162 glycans on the V158 and F158 allotypes as determined by glycoproteomics MS. The N162-containing glycopeptide for F158 provides less intense peaks by ESI-MS/MS as our lab previously noted ([Mol Cell Proteomics](#). 2019 Nov;18(11):2178-2190; [Mol Cell Proteomics](#). 2020 Feb;19(2):362-374). Possible N-glycan configurations are shown as cartoons below the chart.

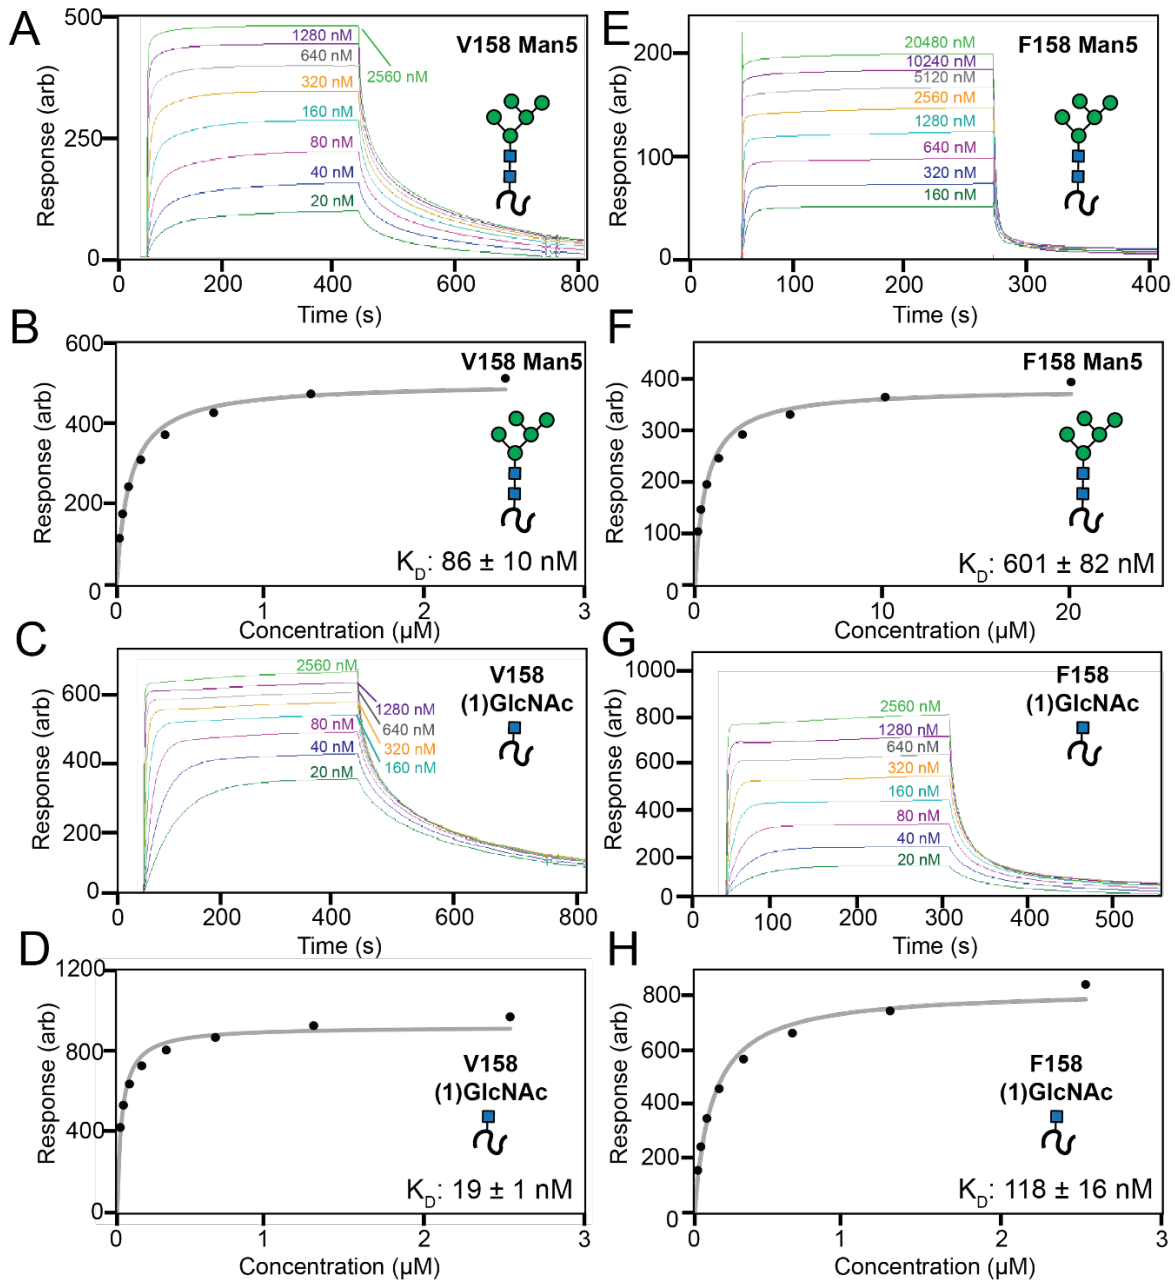

**Supplemental Figure 3.** Representative surface plasmon resonance (SPR) sensorgrams of CD16a allotypes with either Man5 oligomannose N-glycans (A,E) or (1)GlcNAc N-glycans (C,G). Fits of the dissociation constants and associated errors from equilibrium binding measurements are also shown (B,D,F,H). Cartoons show the expected N-glycan at the N162 site.

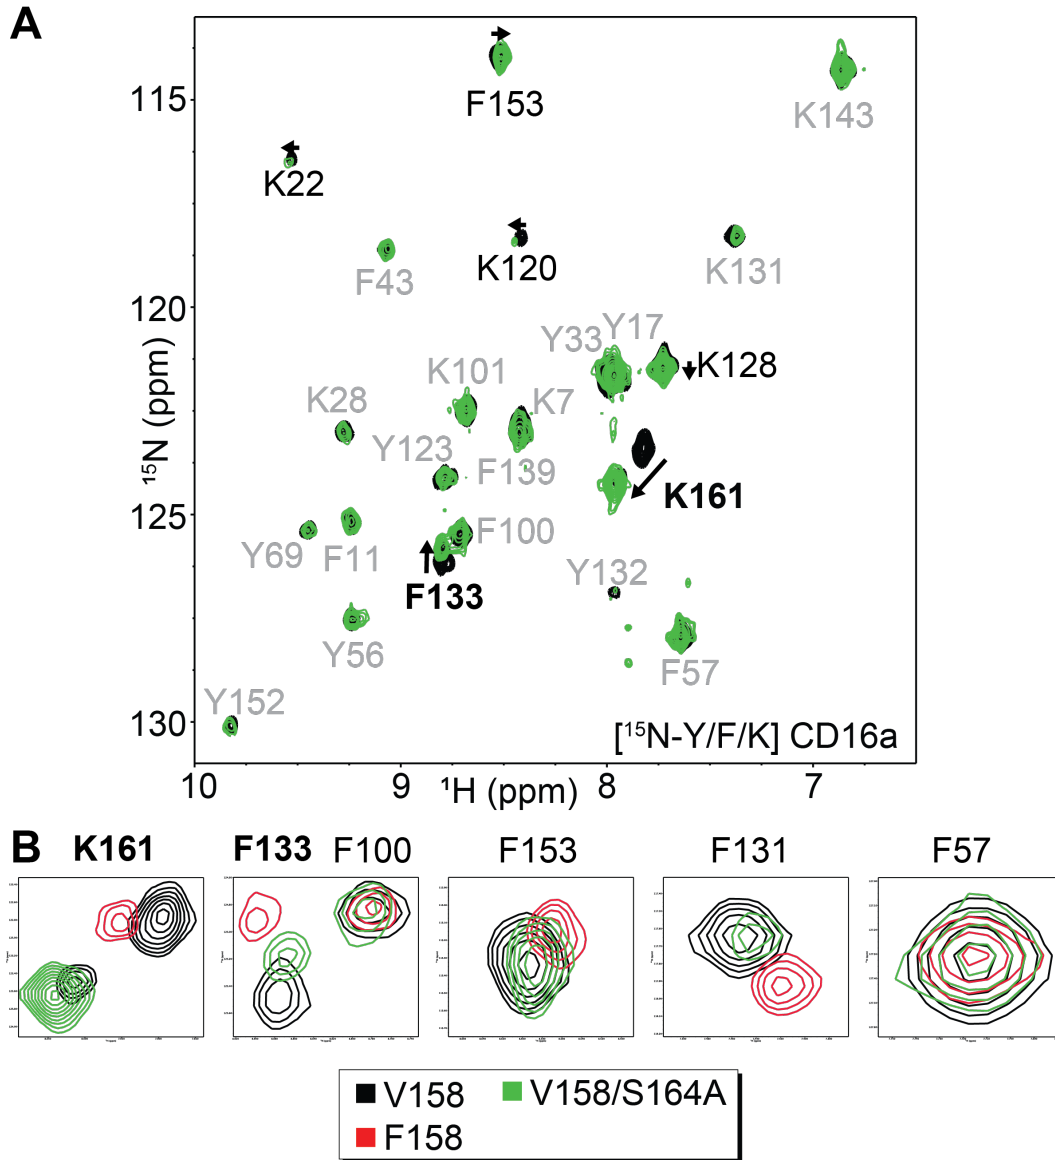

**Supplemental Figure 4.** (A) Overlay of HSQC-TROSY spectra of CD16a V158 with (black) and without (green) the N162 glycan. Residues with large chemical shift perturbations are bolded. (B) Highlighted peaks showing differences between the V158, V158/S164A and F158 spectra.

**Supplemental Figure 5.** Assigned N162 glycopeptide MS2 spectra (following pages)

# MS2 V158 #1

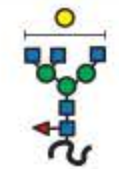

9 8 7 6 5 4 3 2 1  
VGSKNVSSE  
1 2 3 4 5 6 7 8 9

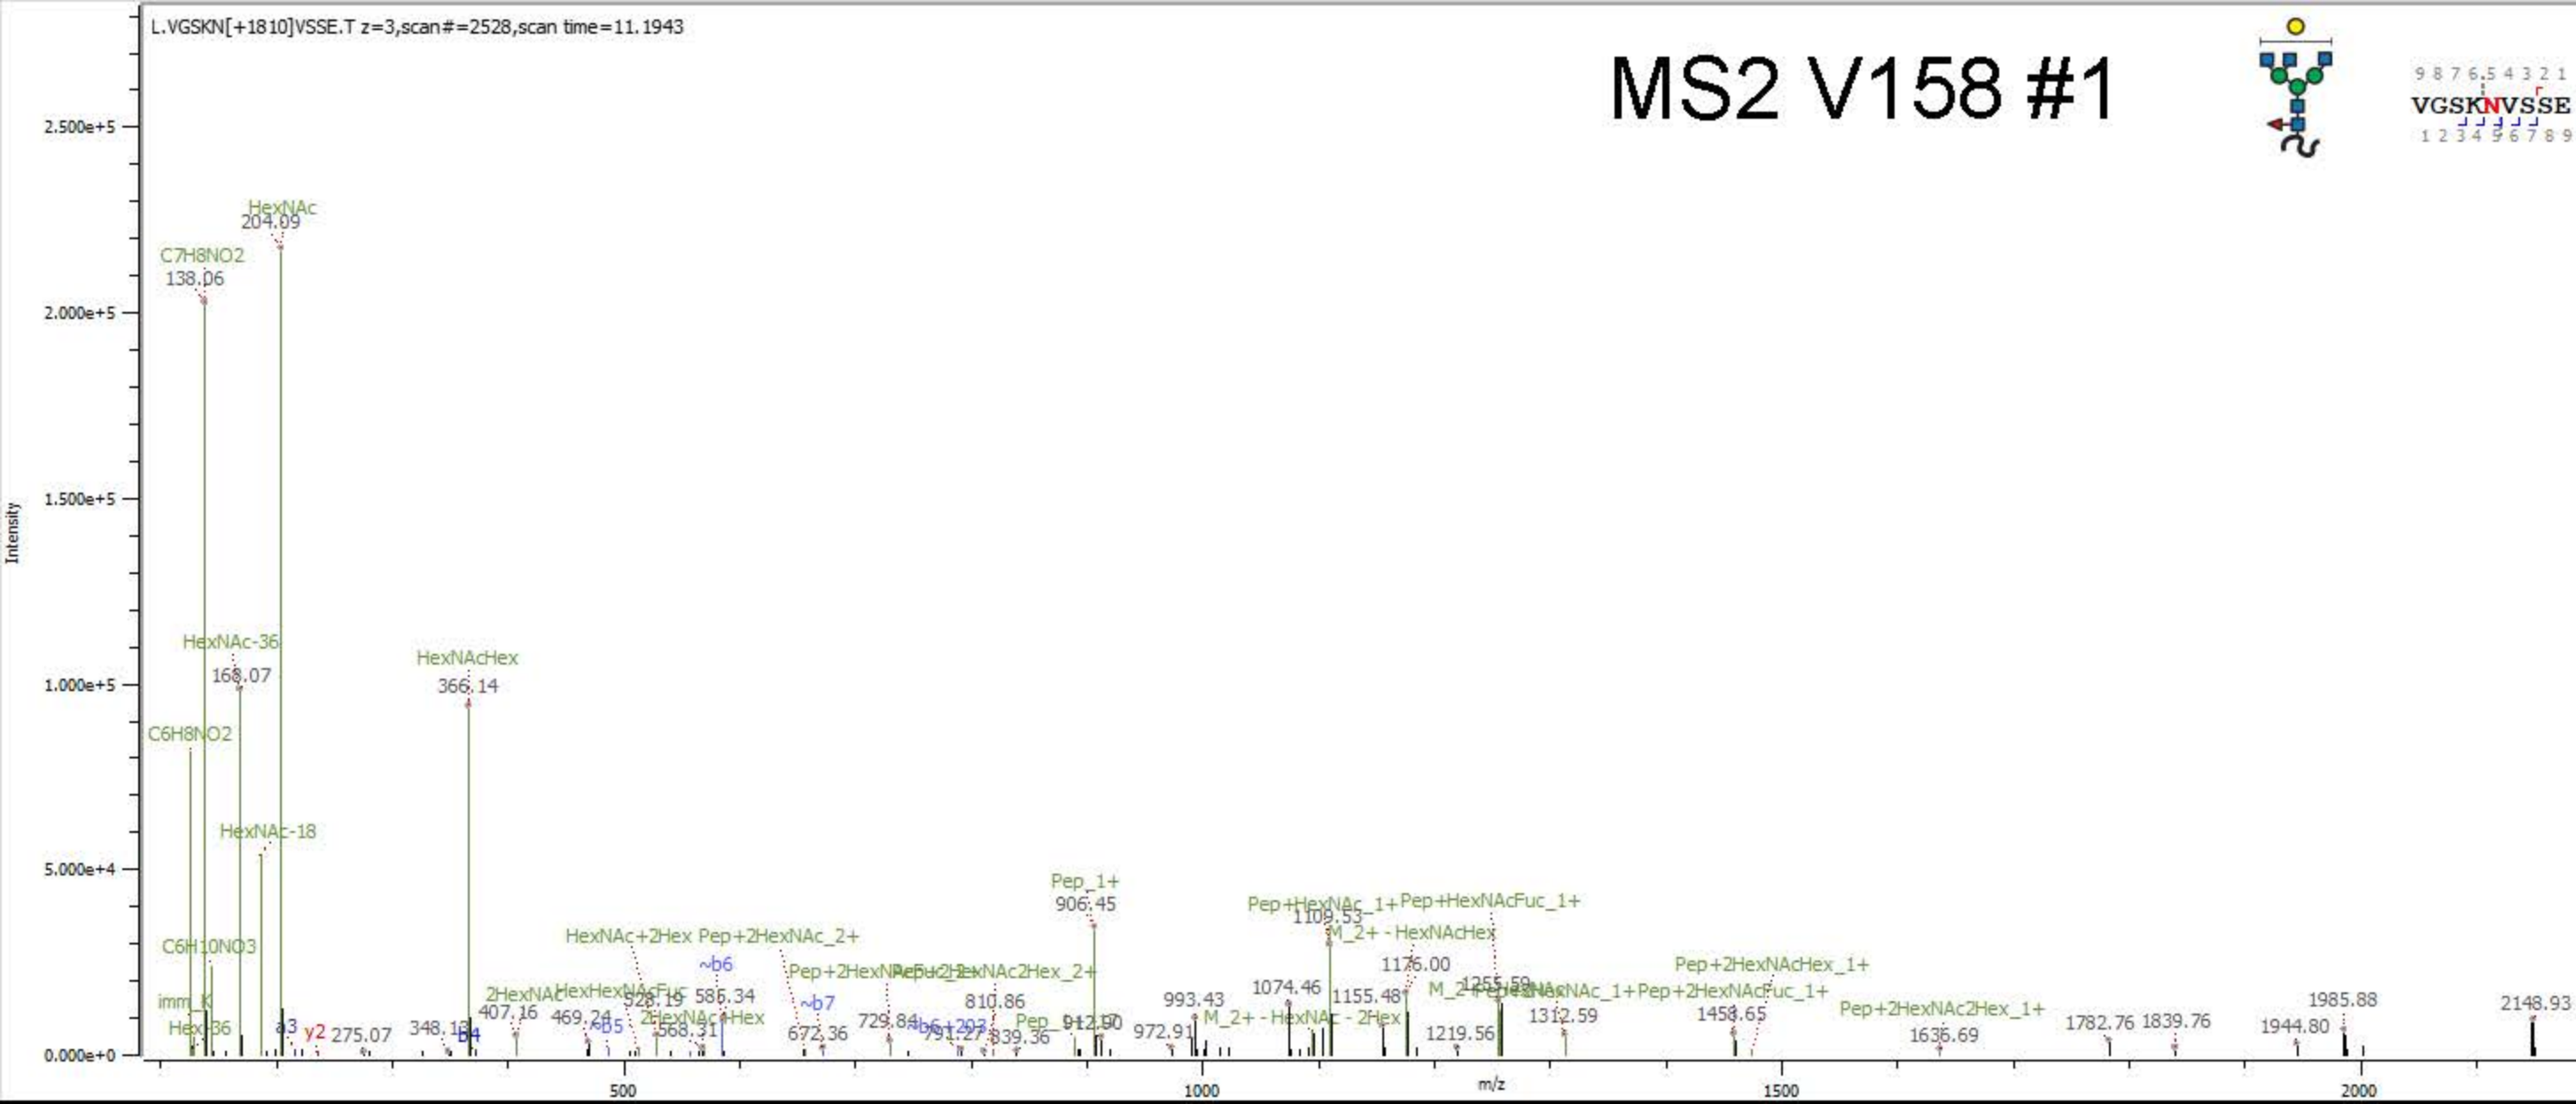

L.VGSKN[+1769]VSSE.T z=3,scan#=-2385,scan time=10.7786

# MS2 V158 #2

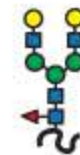

9 8 7 6 5 4 3 2 1  
VGSKNVSSE  
1 2 3 4 5 6 7 8 9

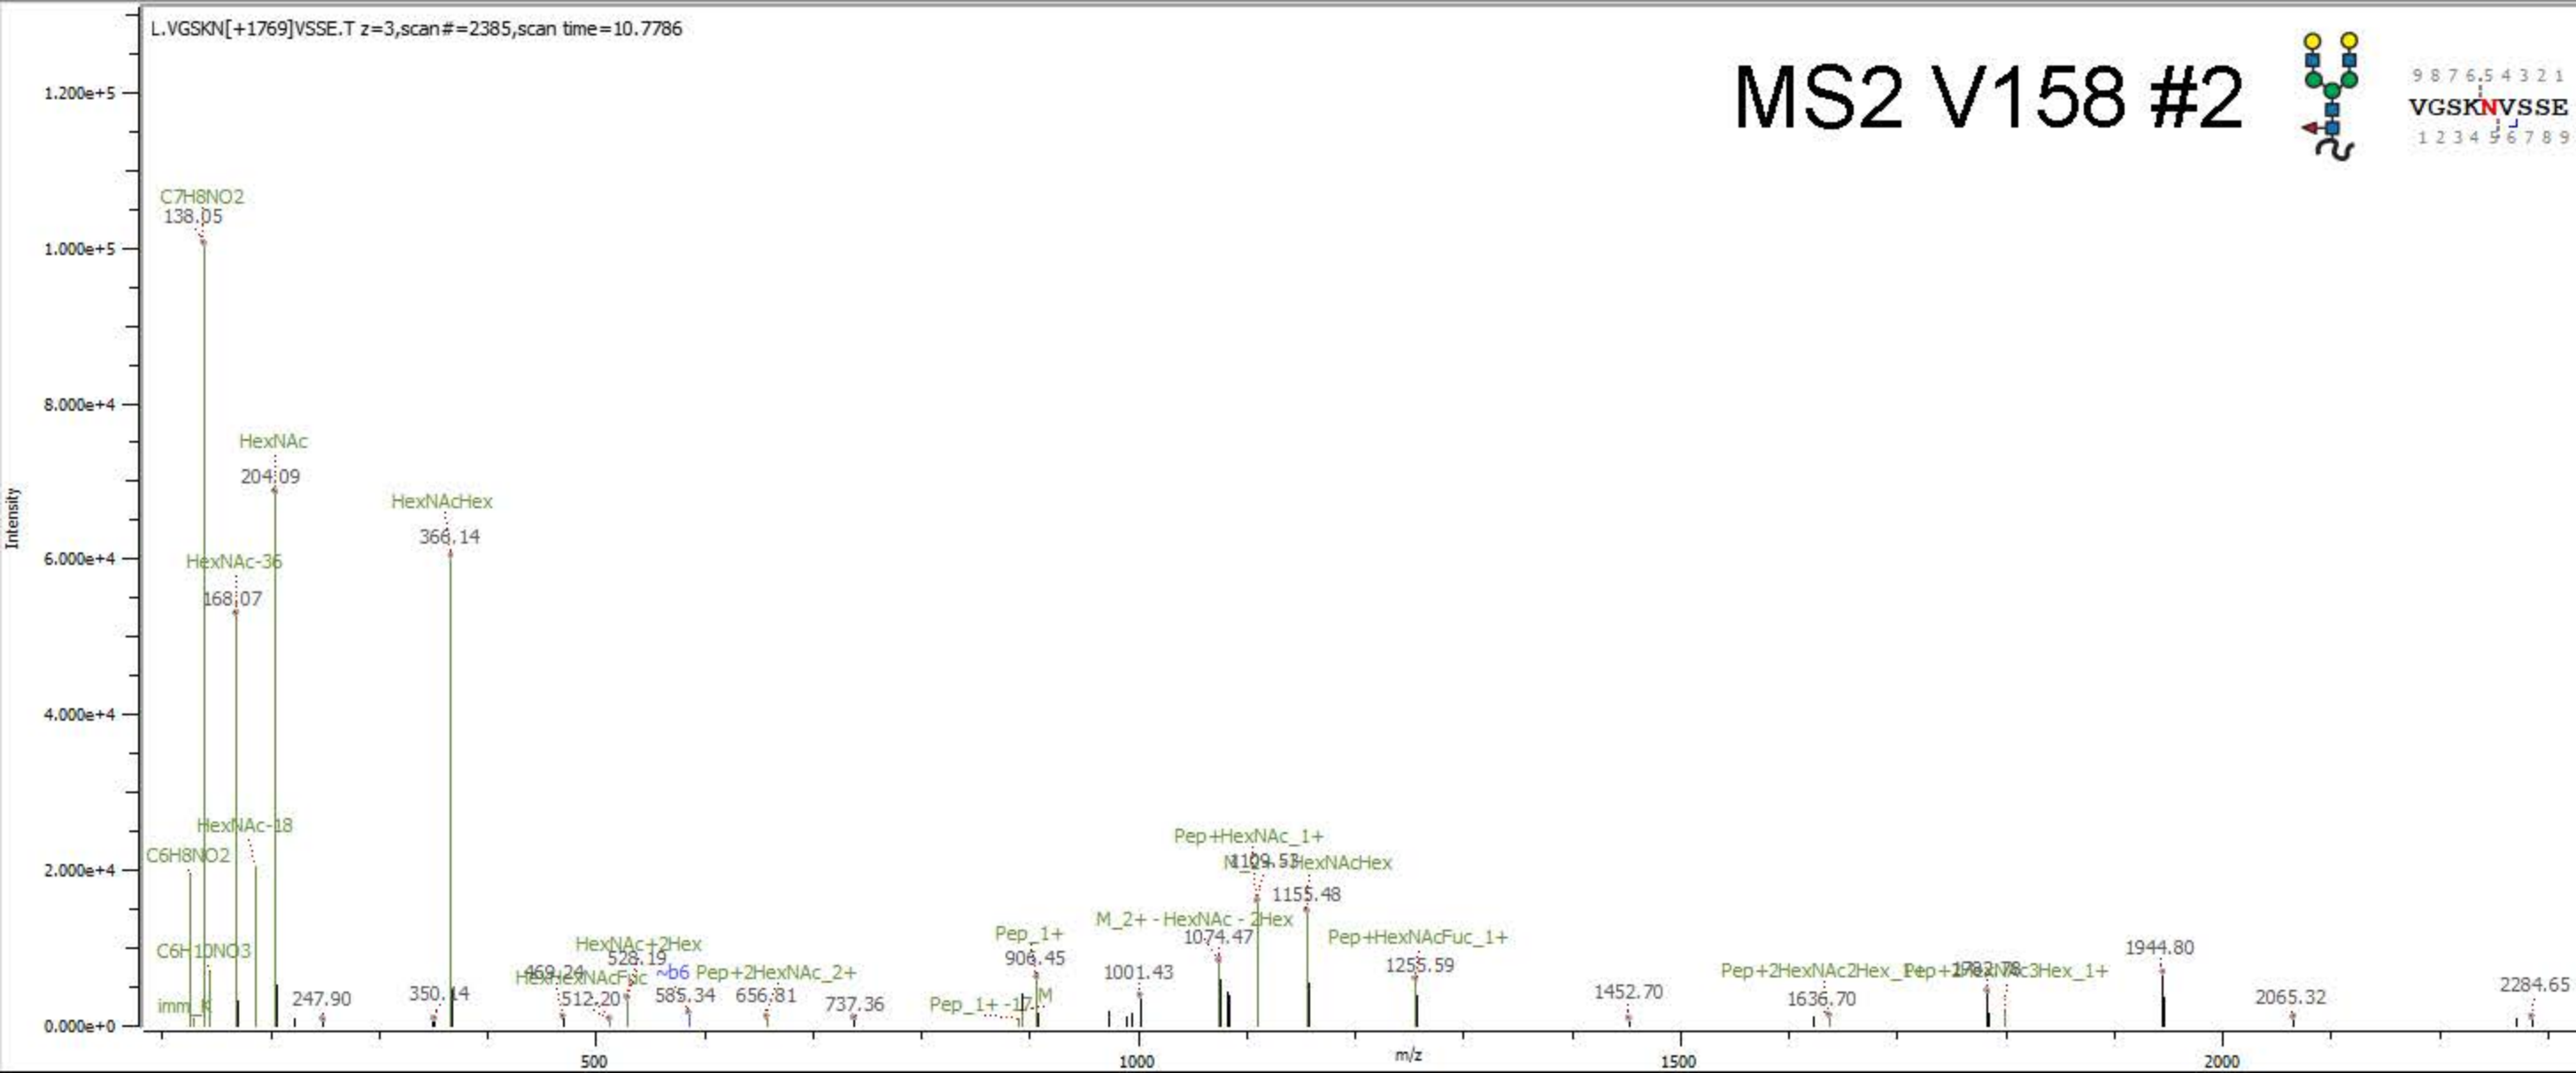



# MS2 V158 #3

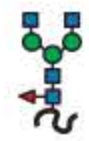

9 8 7 6,5 4 3 2 1  
VGSKNVSSSE  
1 2 3 4 5 6 7 8 9

Intensity

1.500e+5  
1.000e+5  
5.000e+4  
0.000e+0

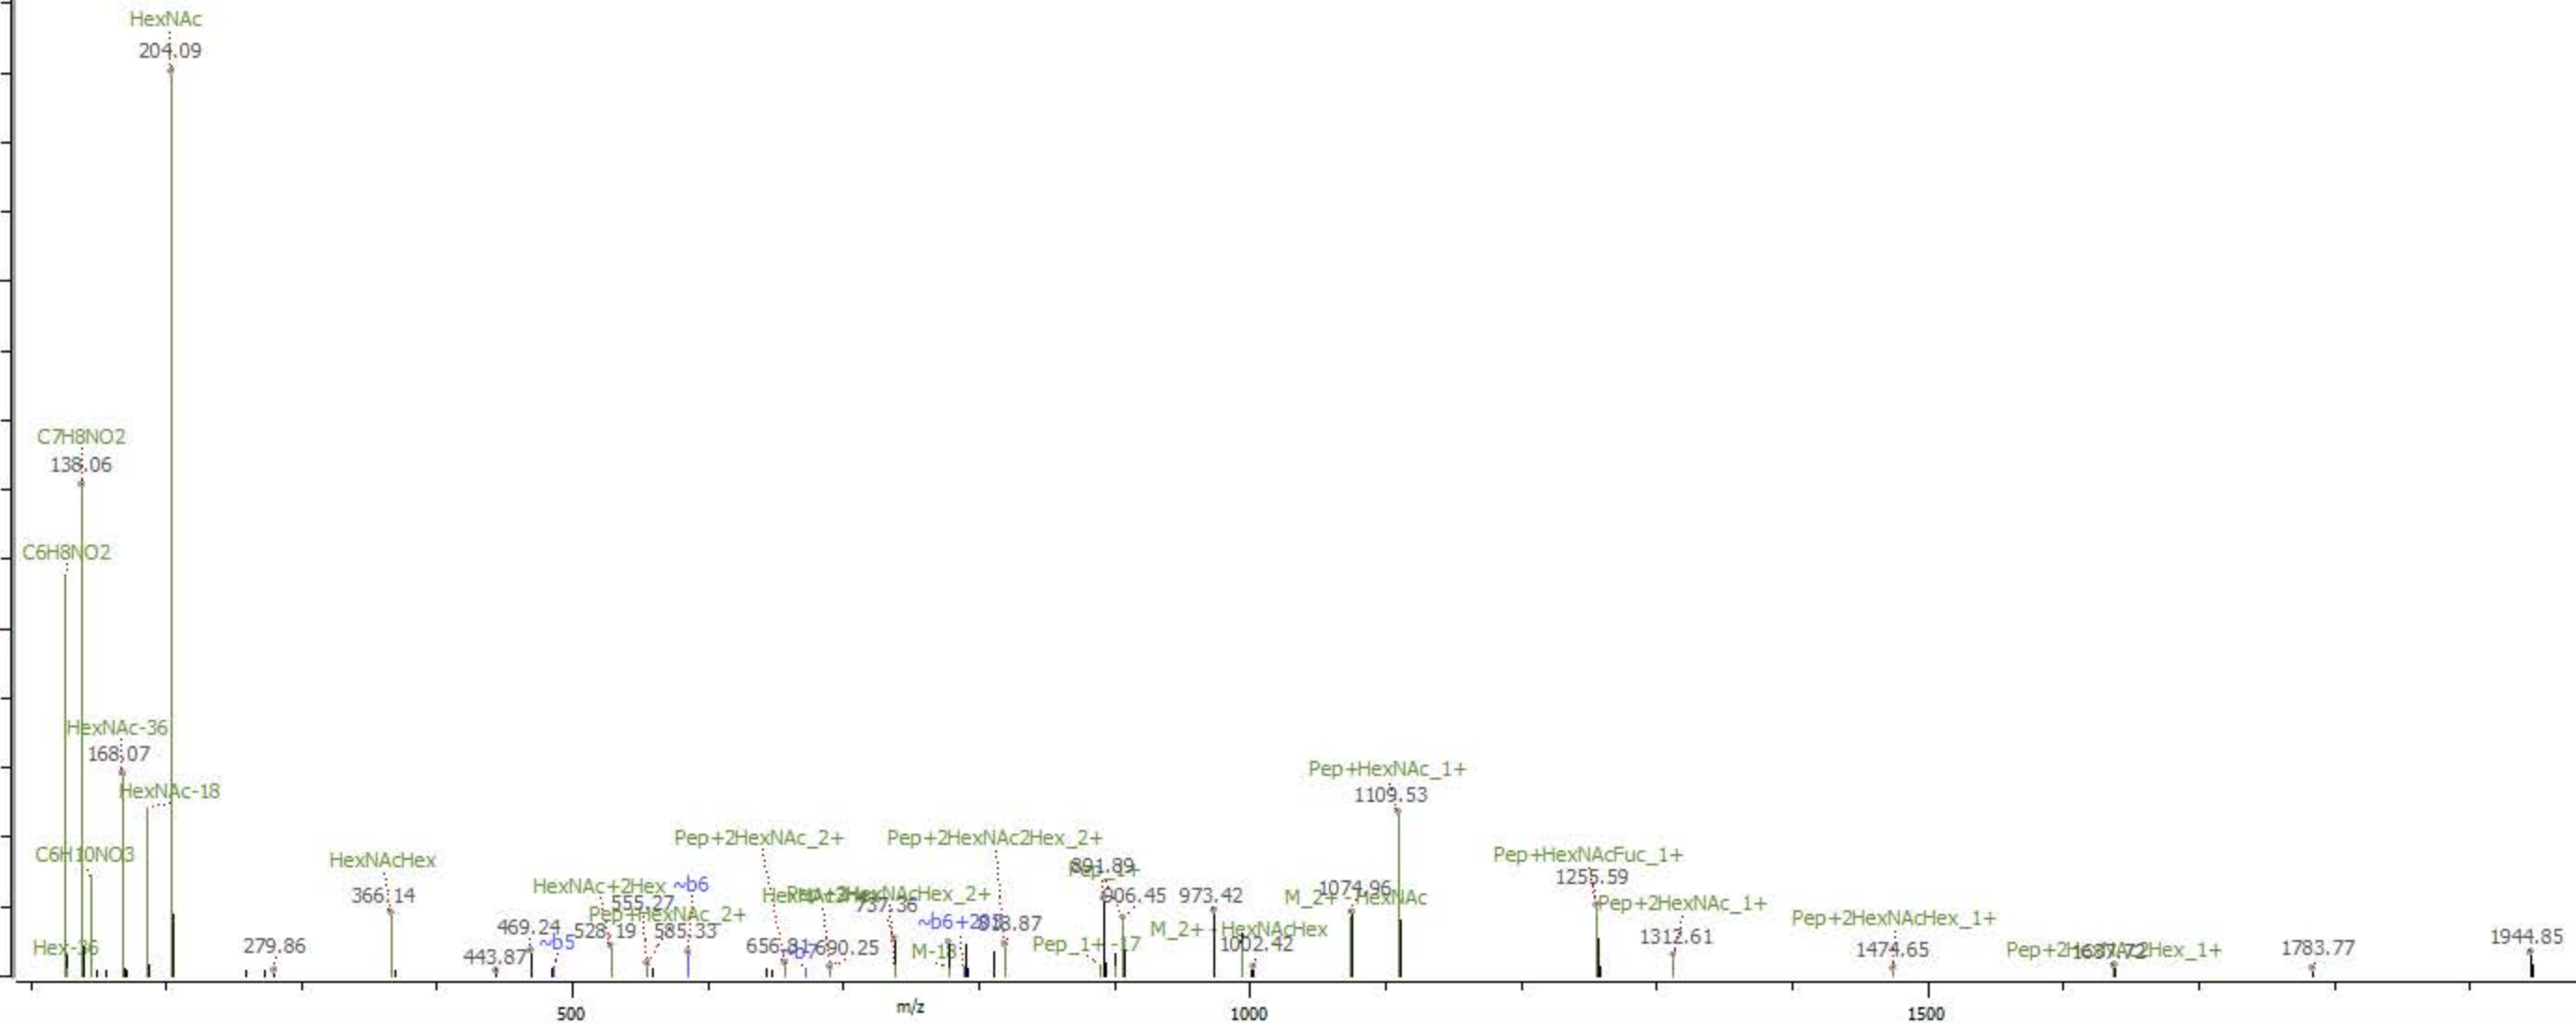

# MS2 V158 #4

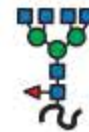

9 8 7 6,5 4 3 2 1  
**VGSKNVSSE**  
 1 2 3 4 5 6 7 8 9

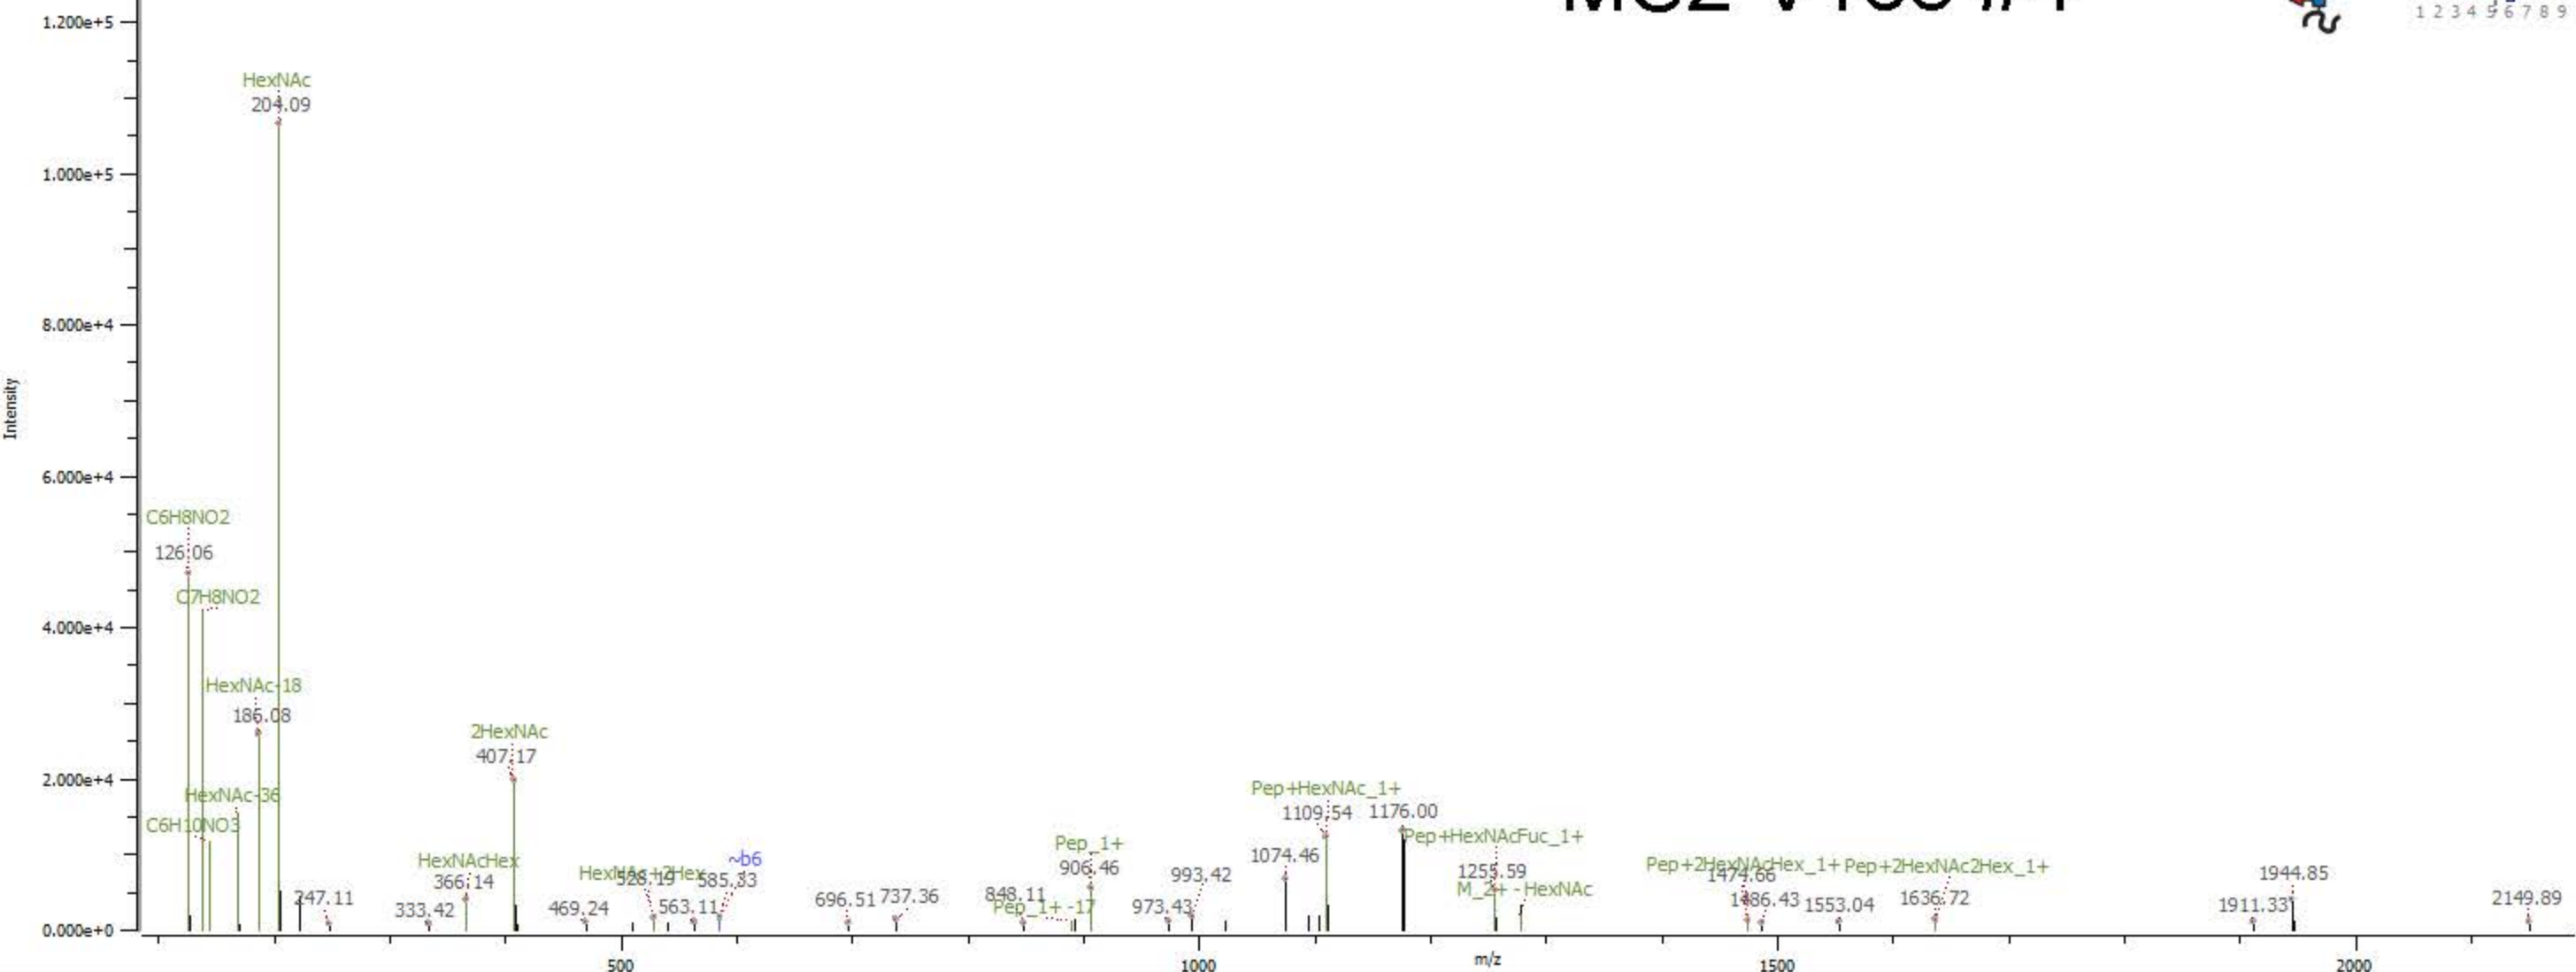

L.VGSKN[+1607]VSSE.T z=3,scan#=#2377,scan time=10.7514

# MS2 V158 #5

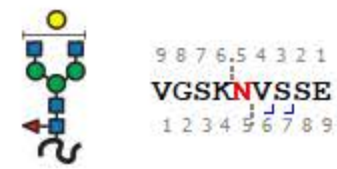

Intensity

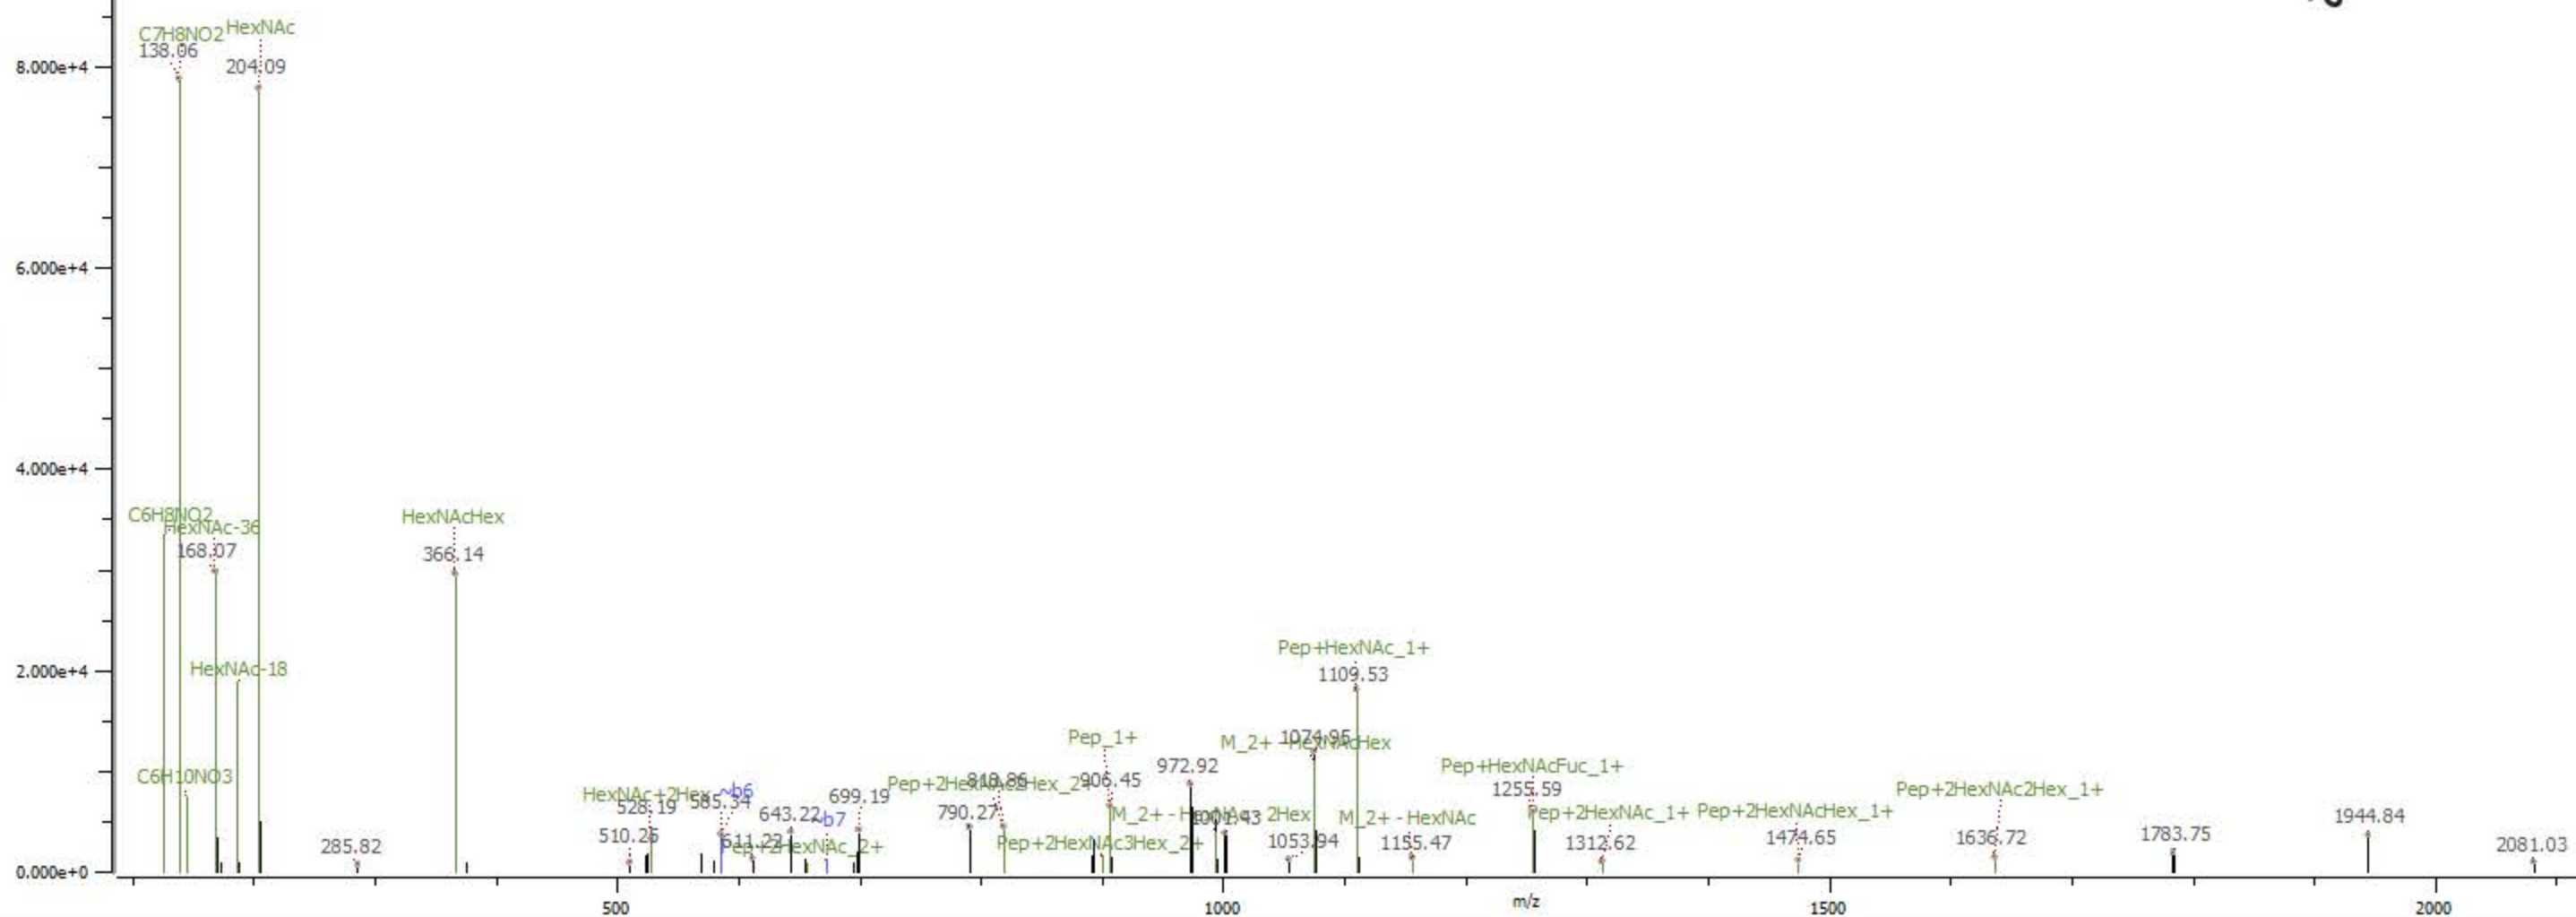

L.VGSKN[+1648]VSSE.T z=3,scan#=-2466,scan time=11.0135

# MS2 V158 #6

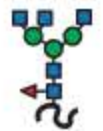

9 8 7 6 5 4 3 2 1  
VGSKNVSSE  
1 2 3 4 5 6 7 8 9

Intensity

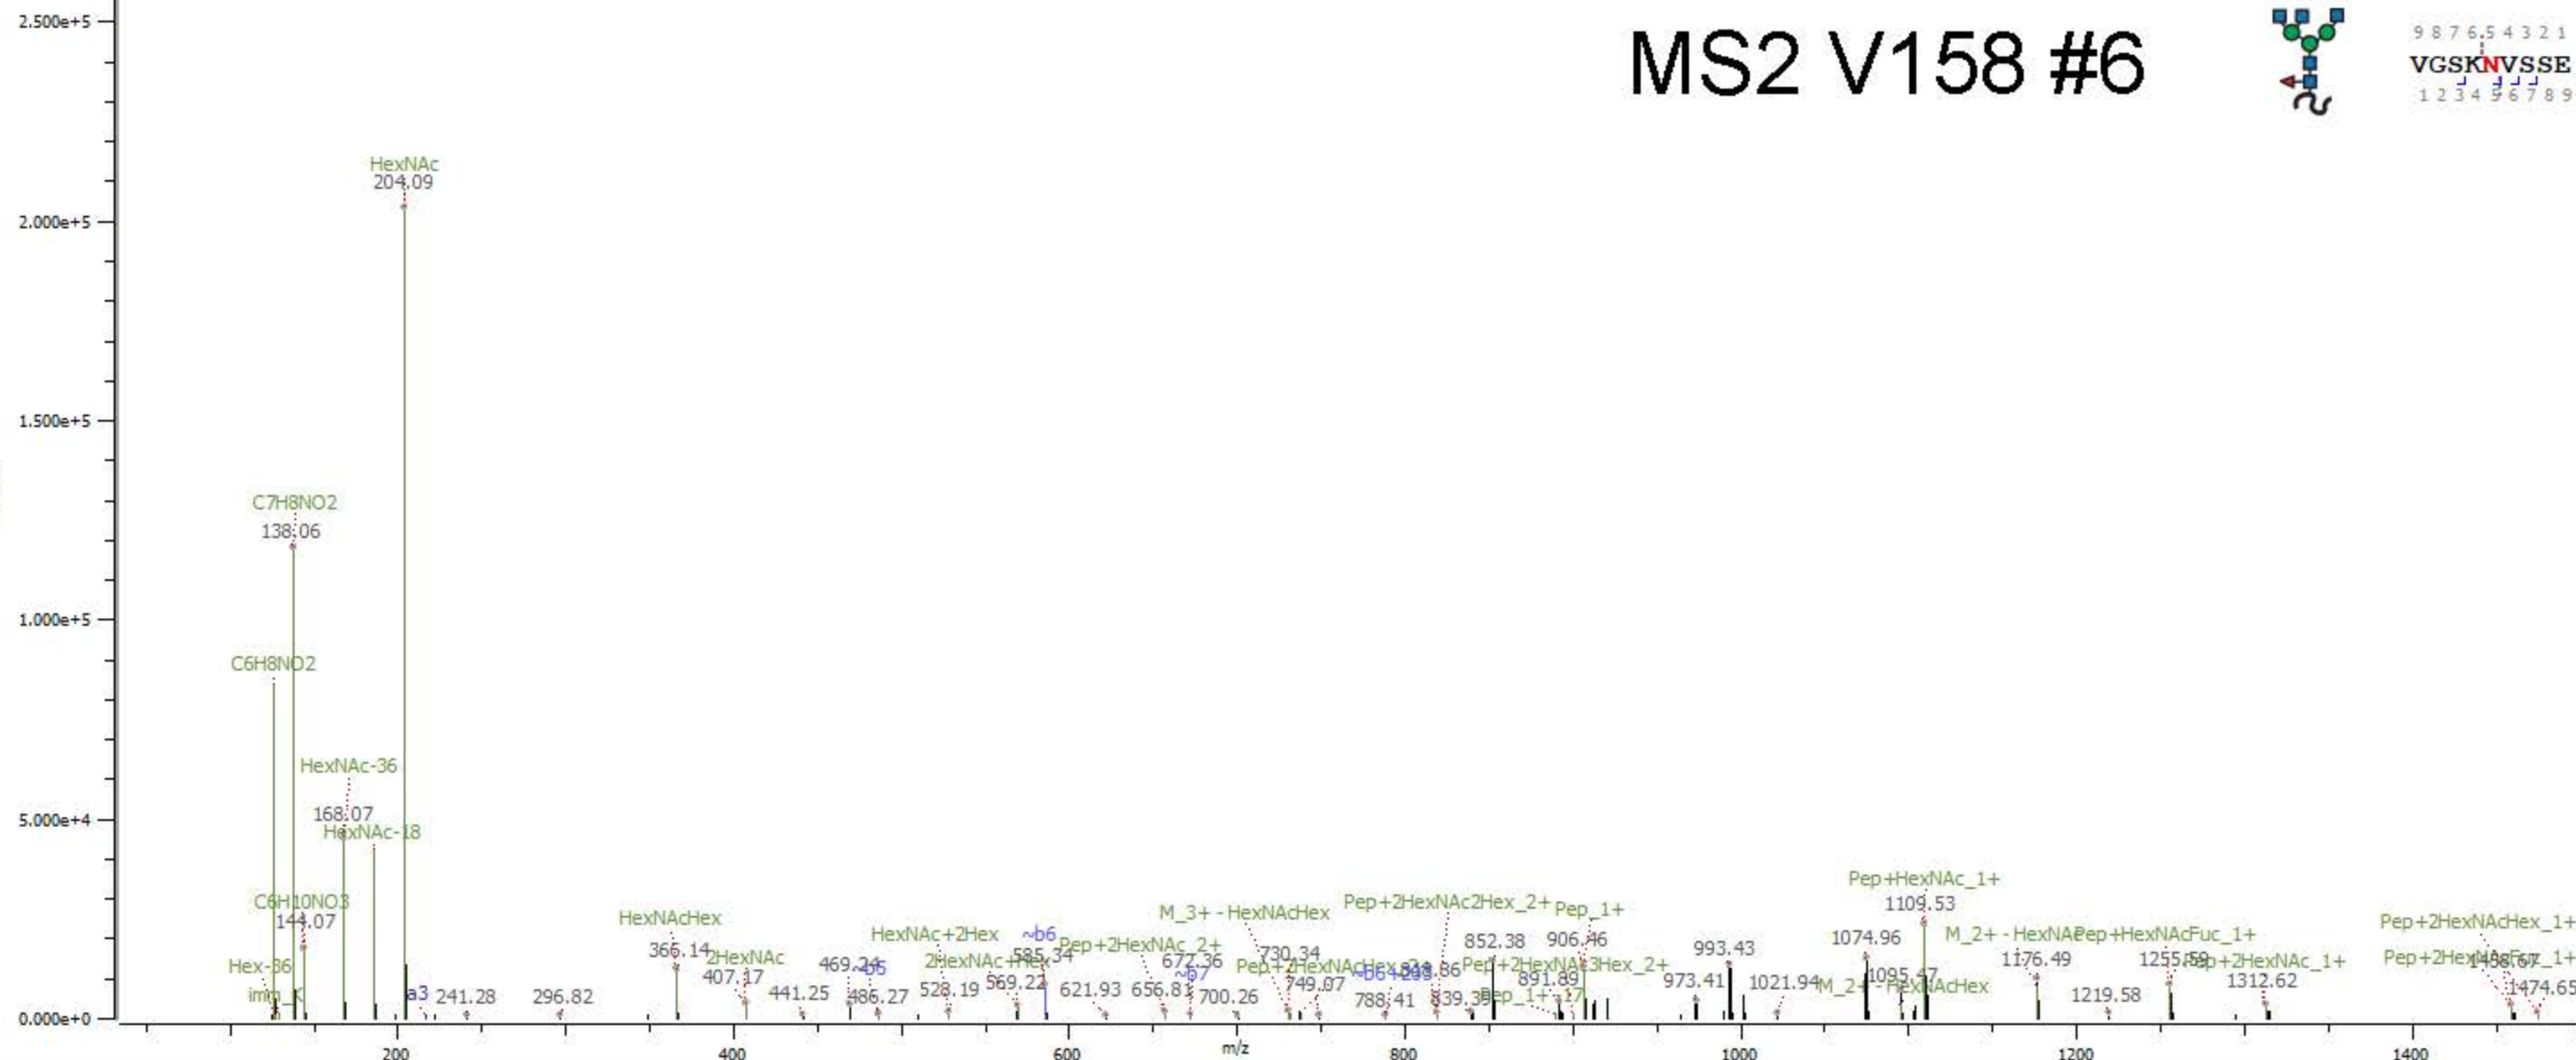

# MS2 V158 #7

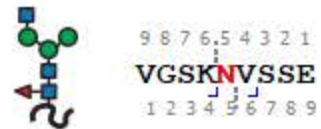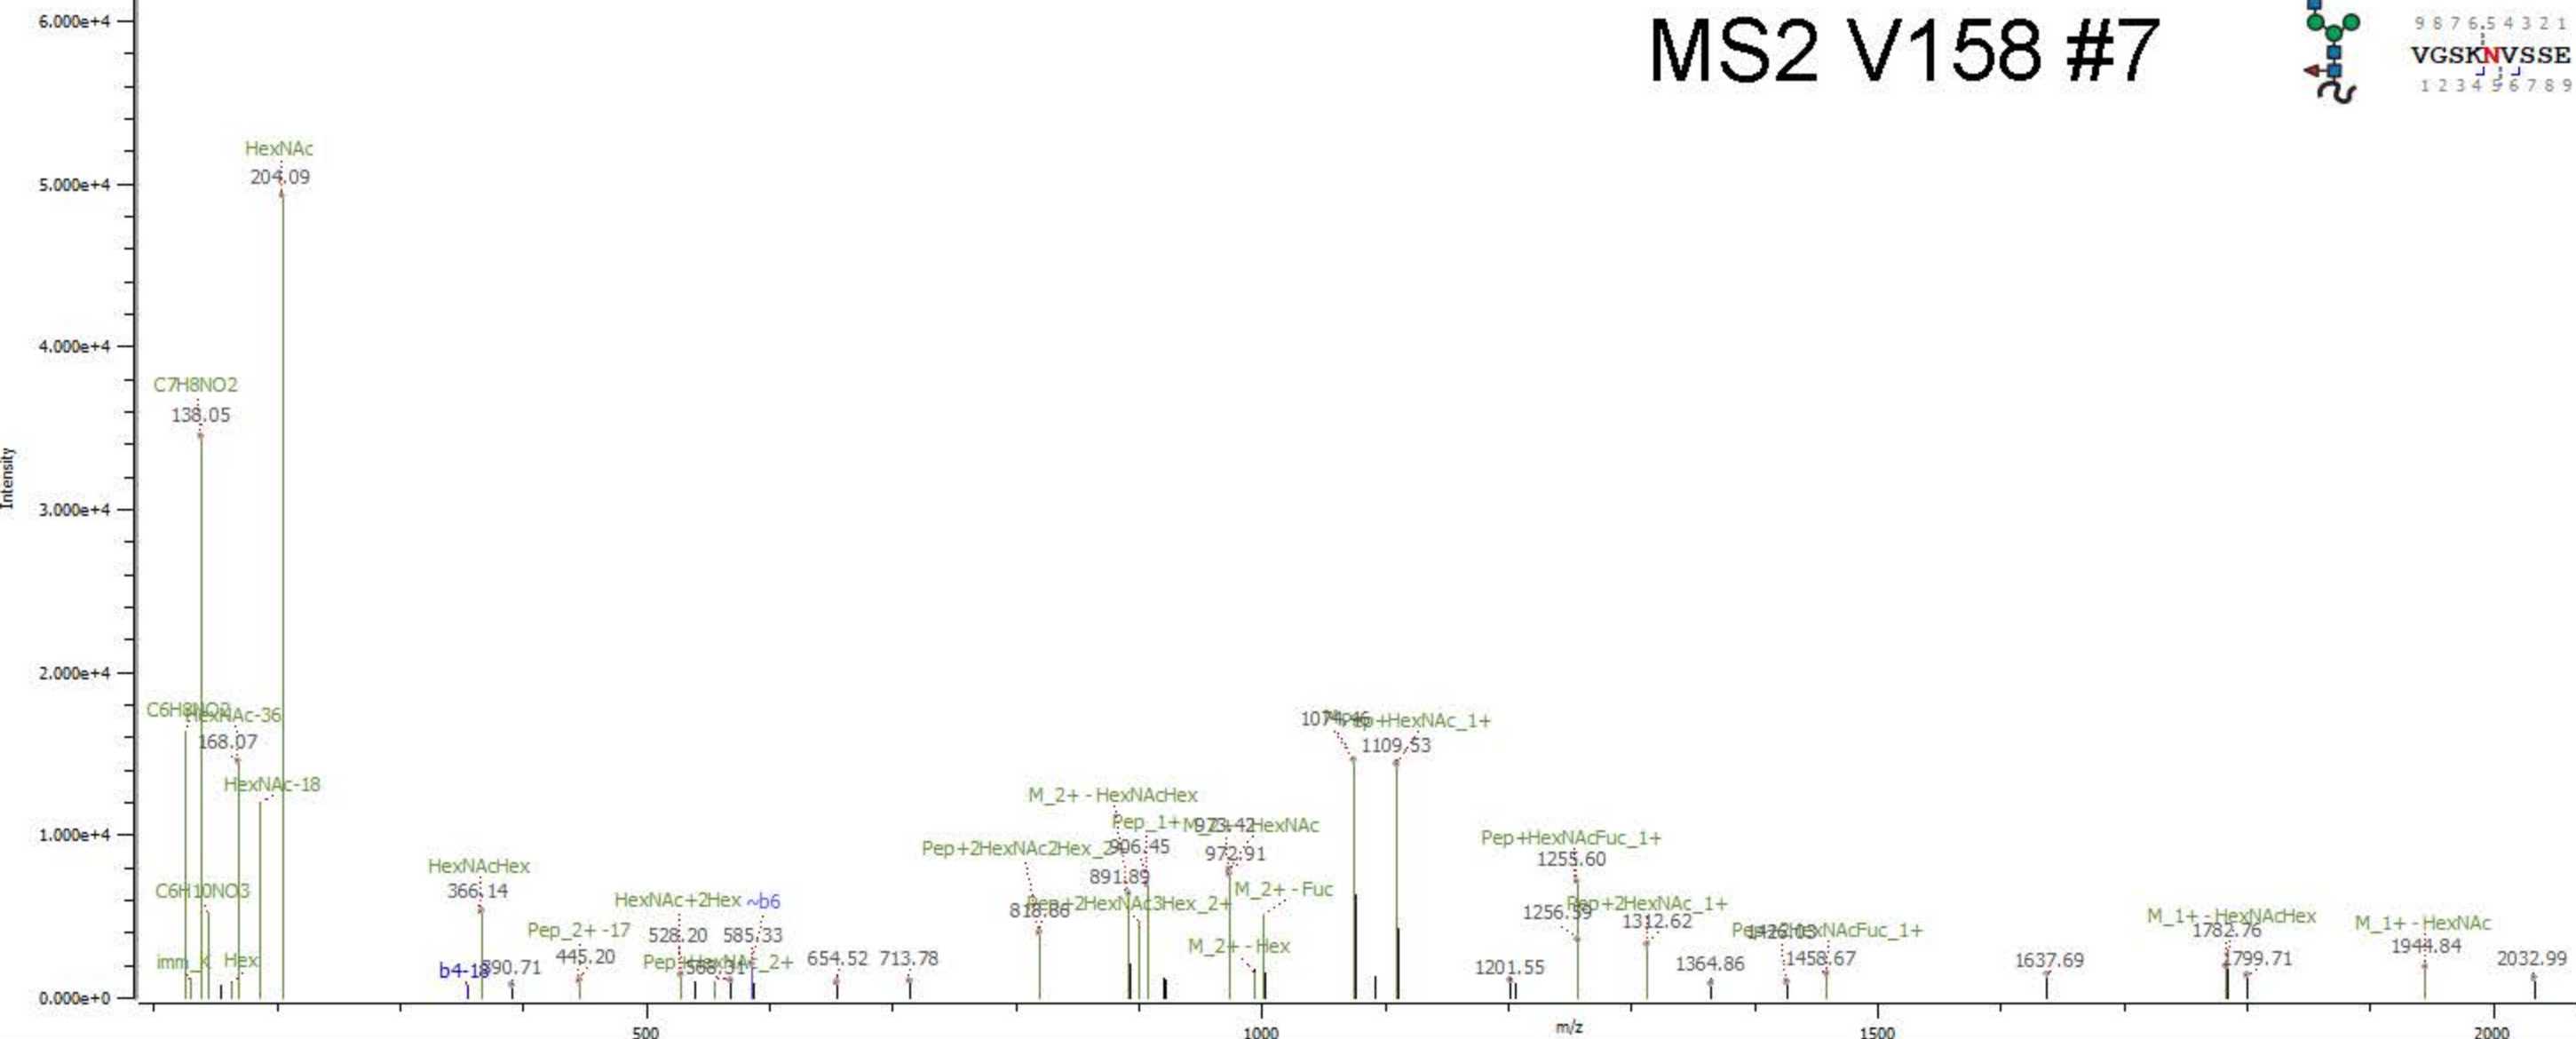

# MS2 V158 #8

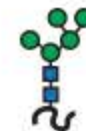

CRGLVGSKNVSSE  
 1 2 3 4 5 6 7 8 9 10  
 ,109 8 7 6,5 4 3 2 1

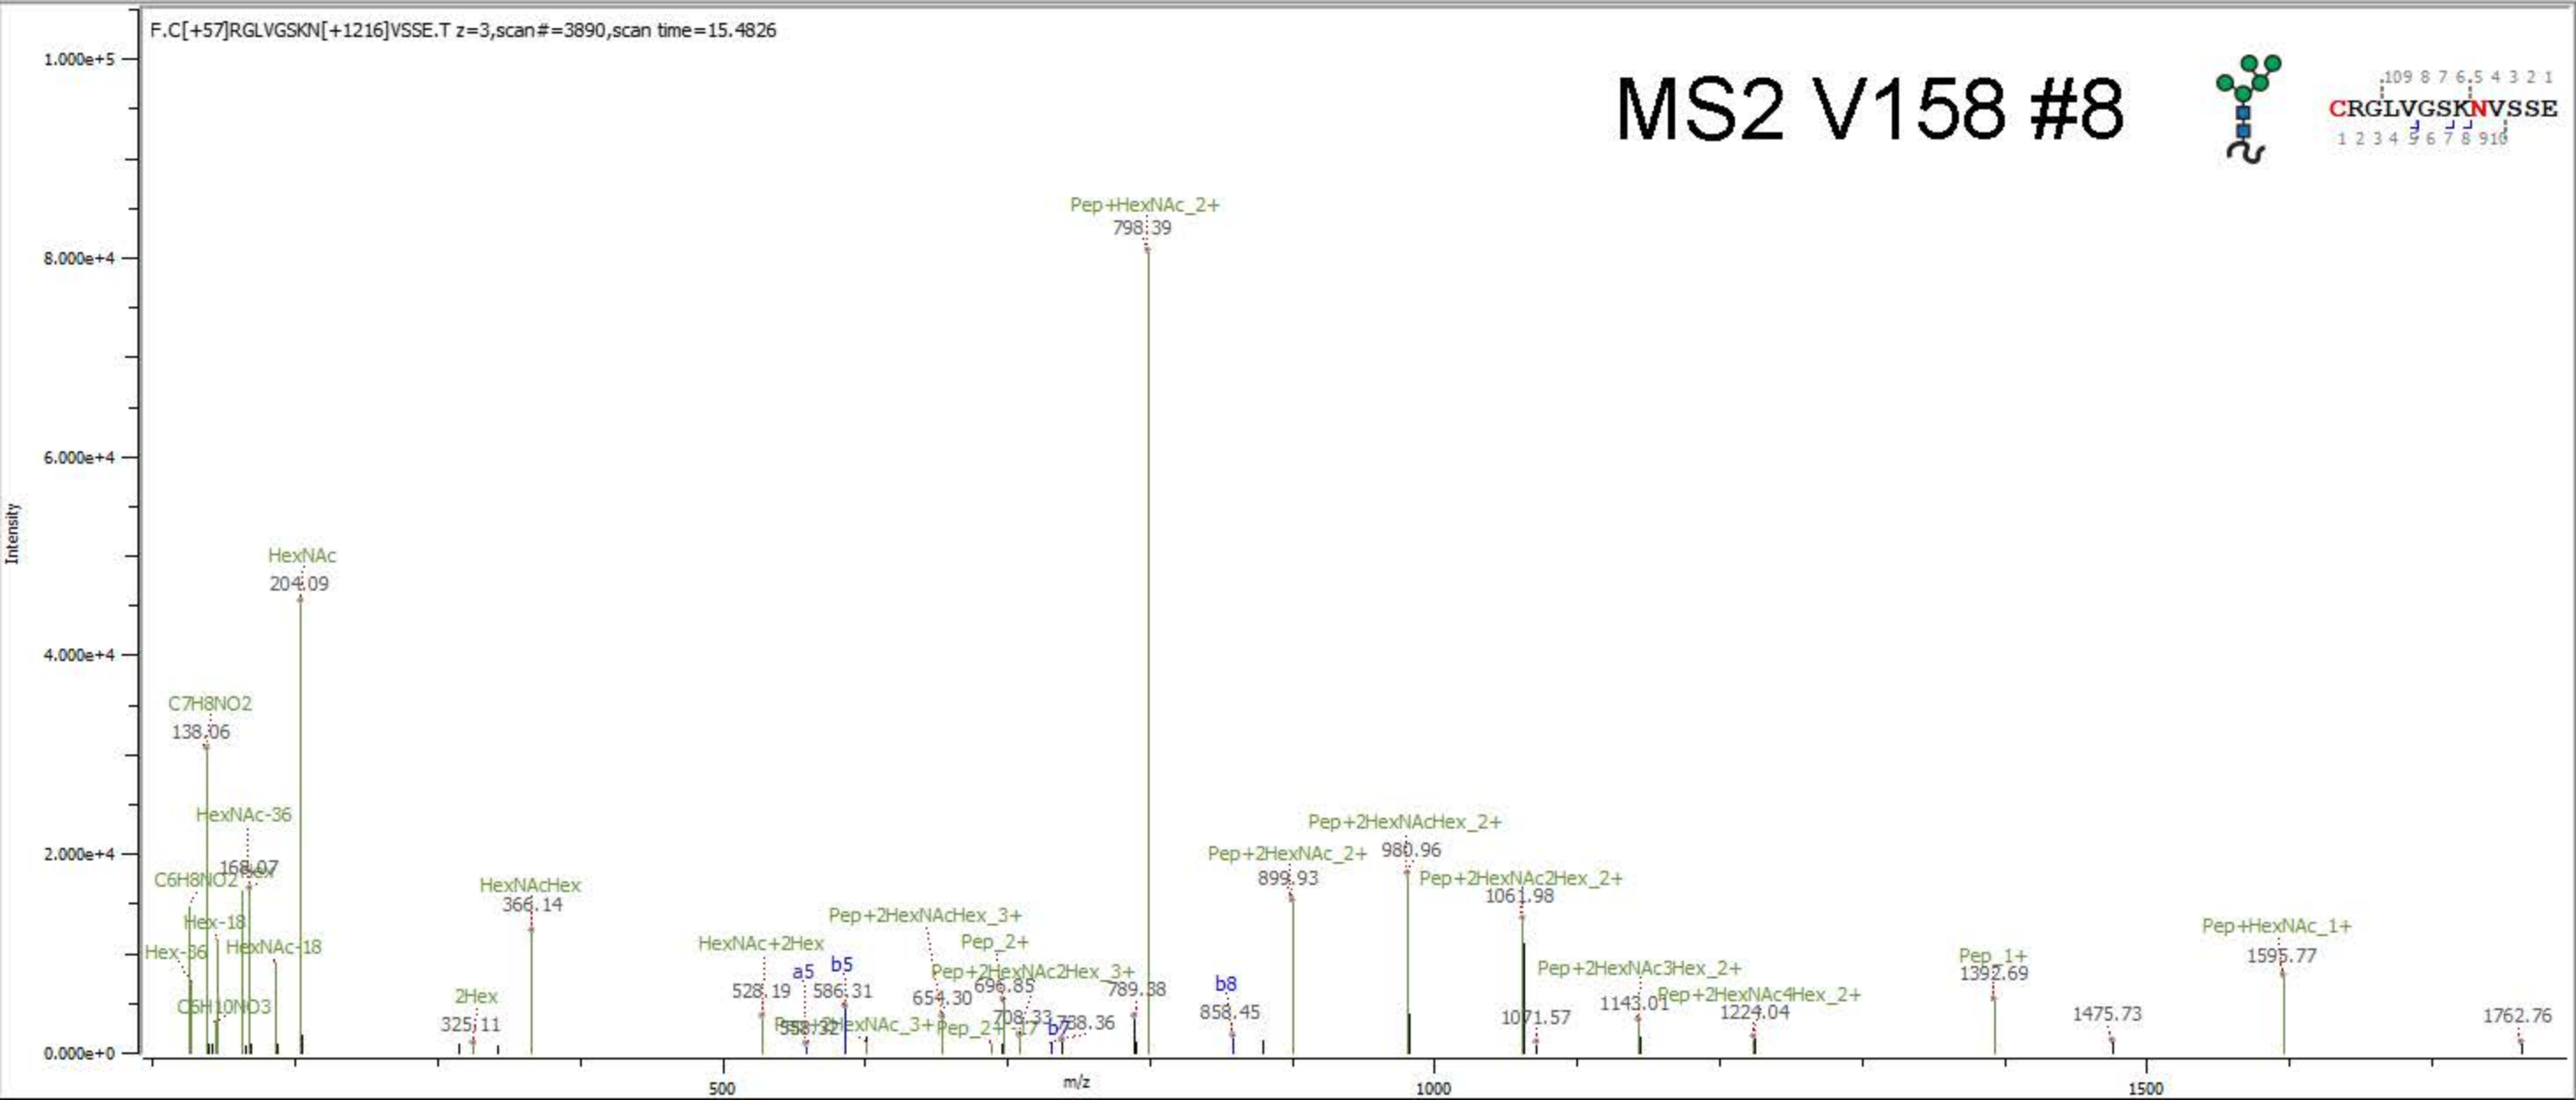

L.VGSKN[+1972]VSSE.T z=3,scan#=2599,scan time=11.4290

# MS2 V158 #9

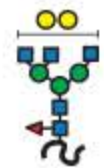

9 8 7 6 5 4 3 2 1  
VGSKNVSSE  
1 2 3 4 5 6 7 8 9

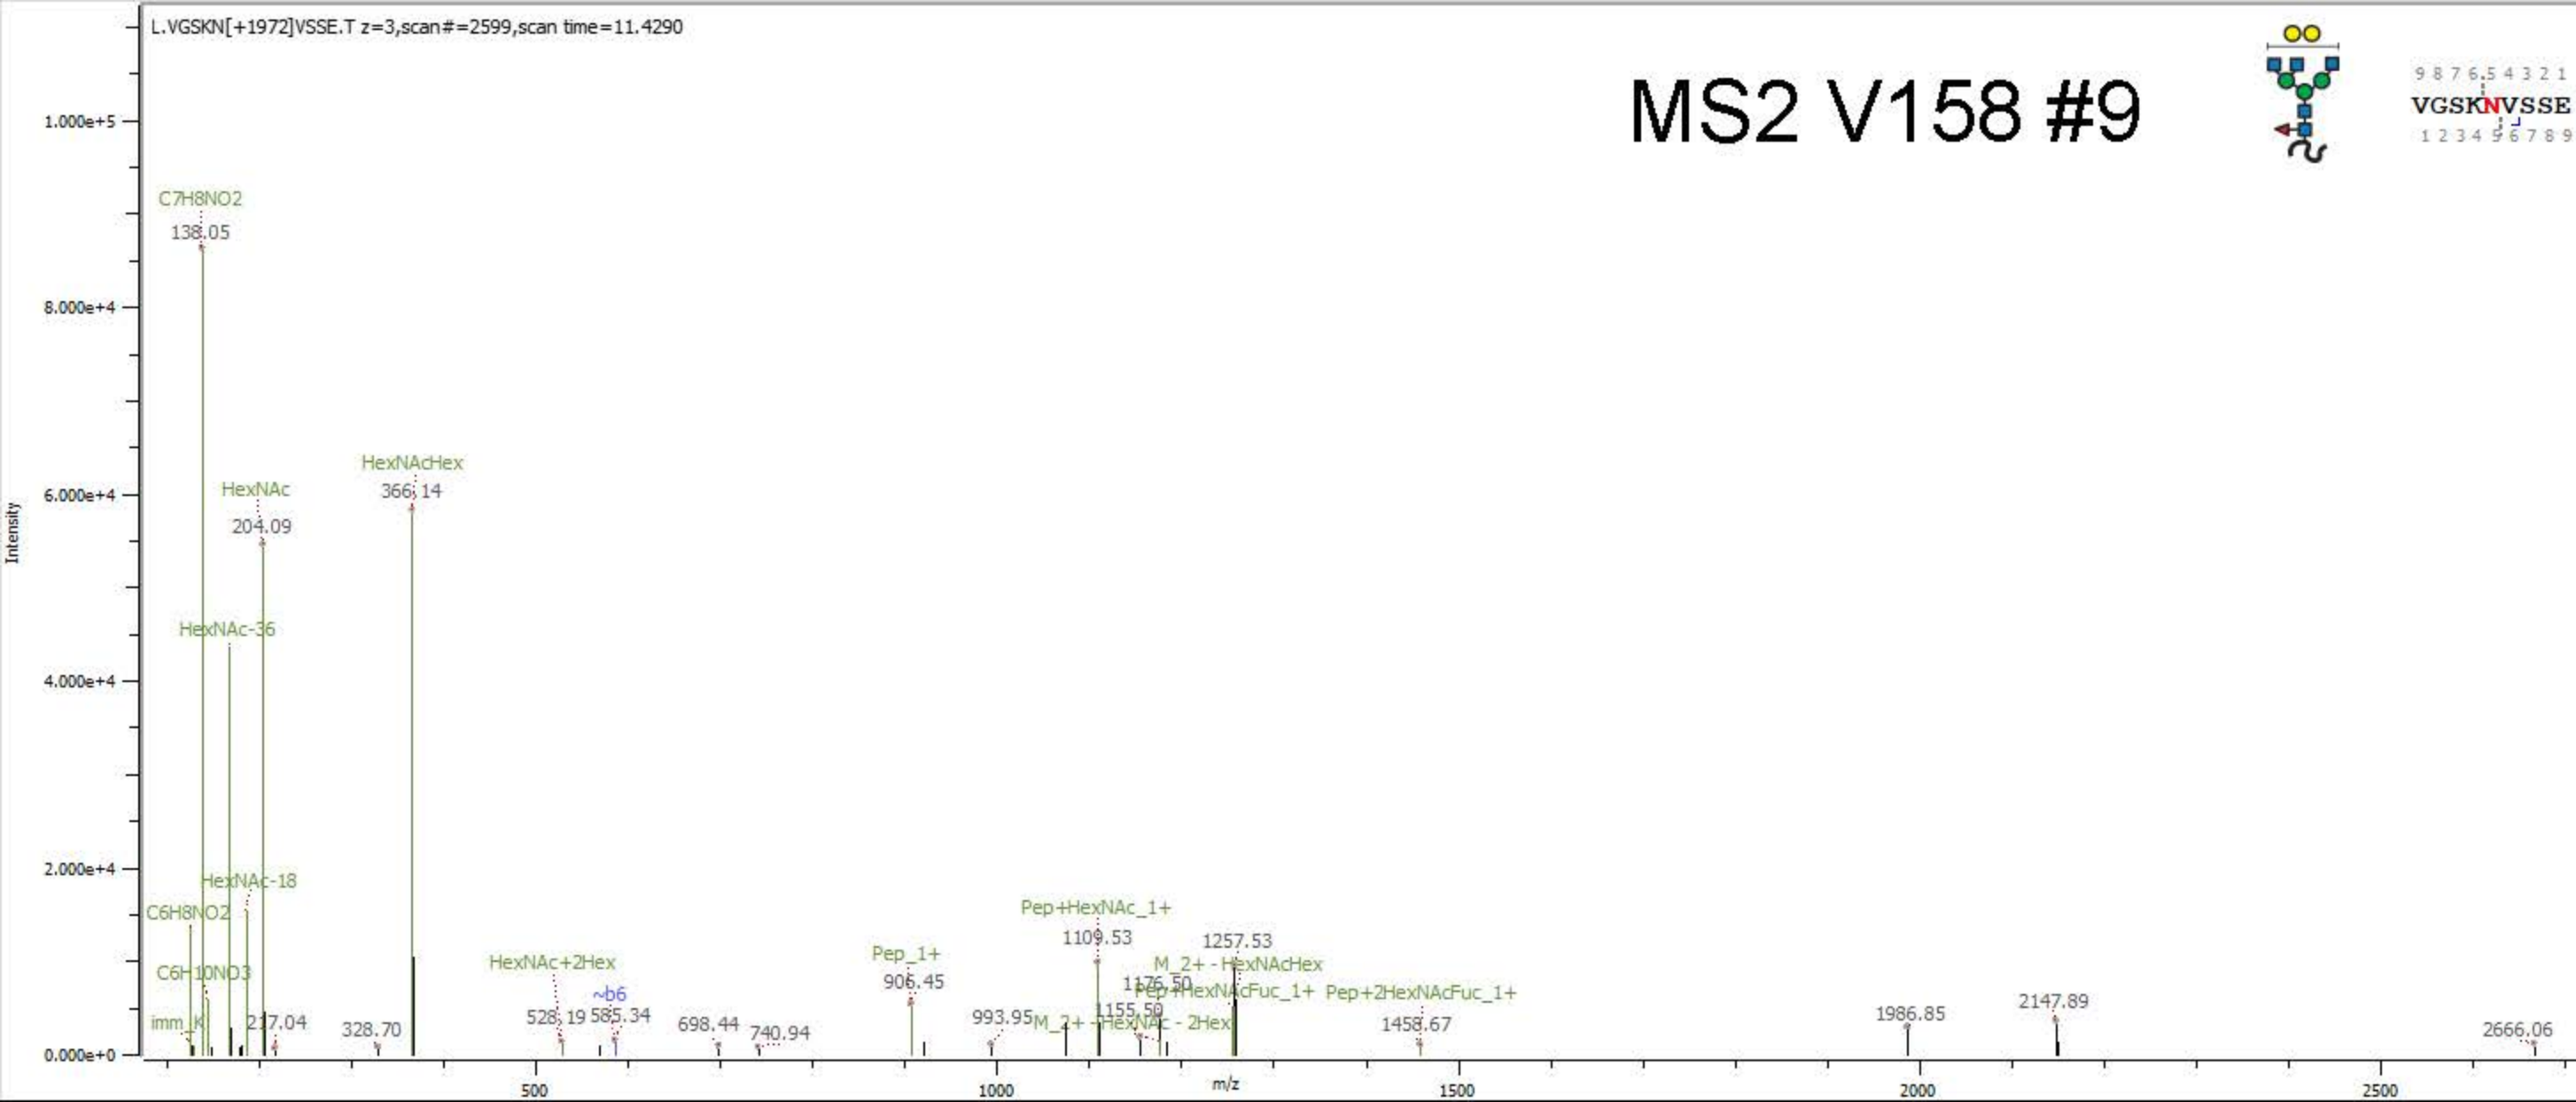

# MS2 V158 #10

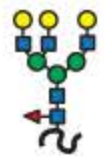

9 8 7 6 5 4 3 2 1  
VGSKNVSSE  
1 2 3 4 5 6 7 8 9

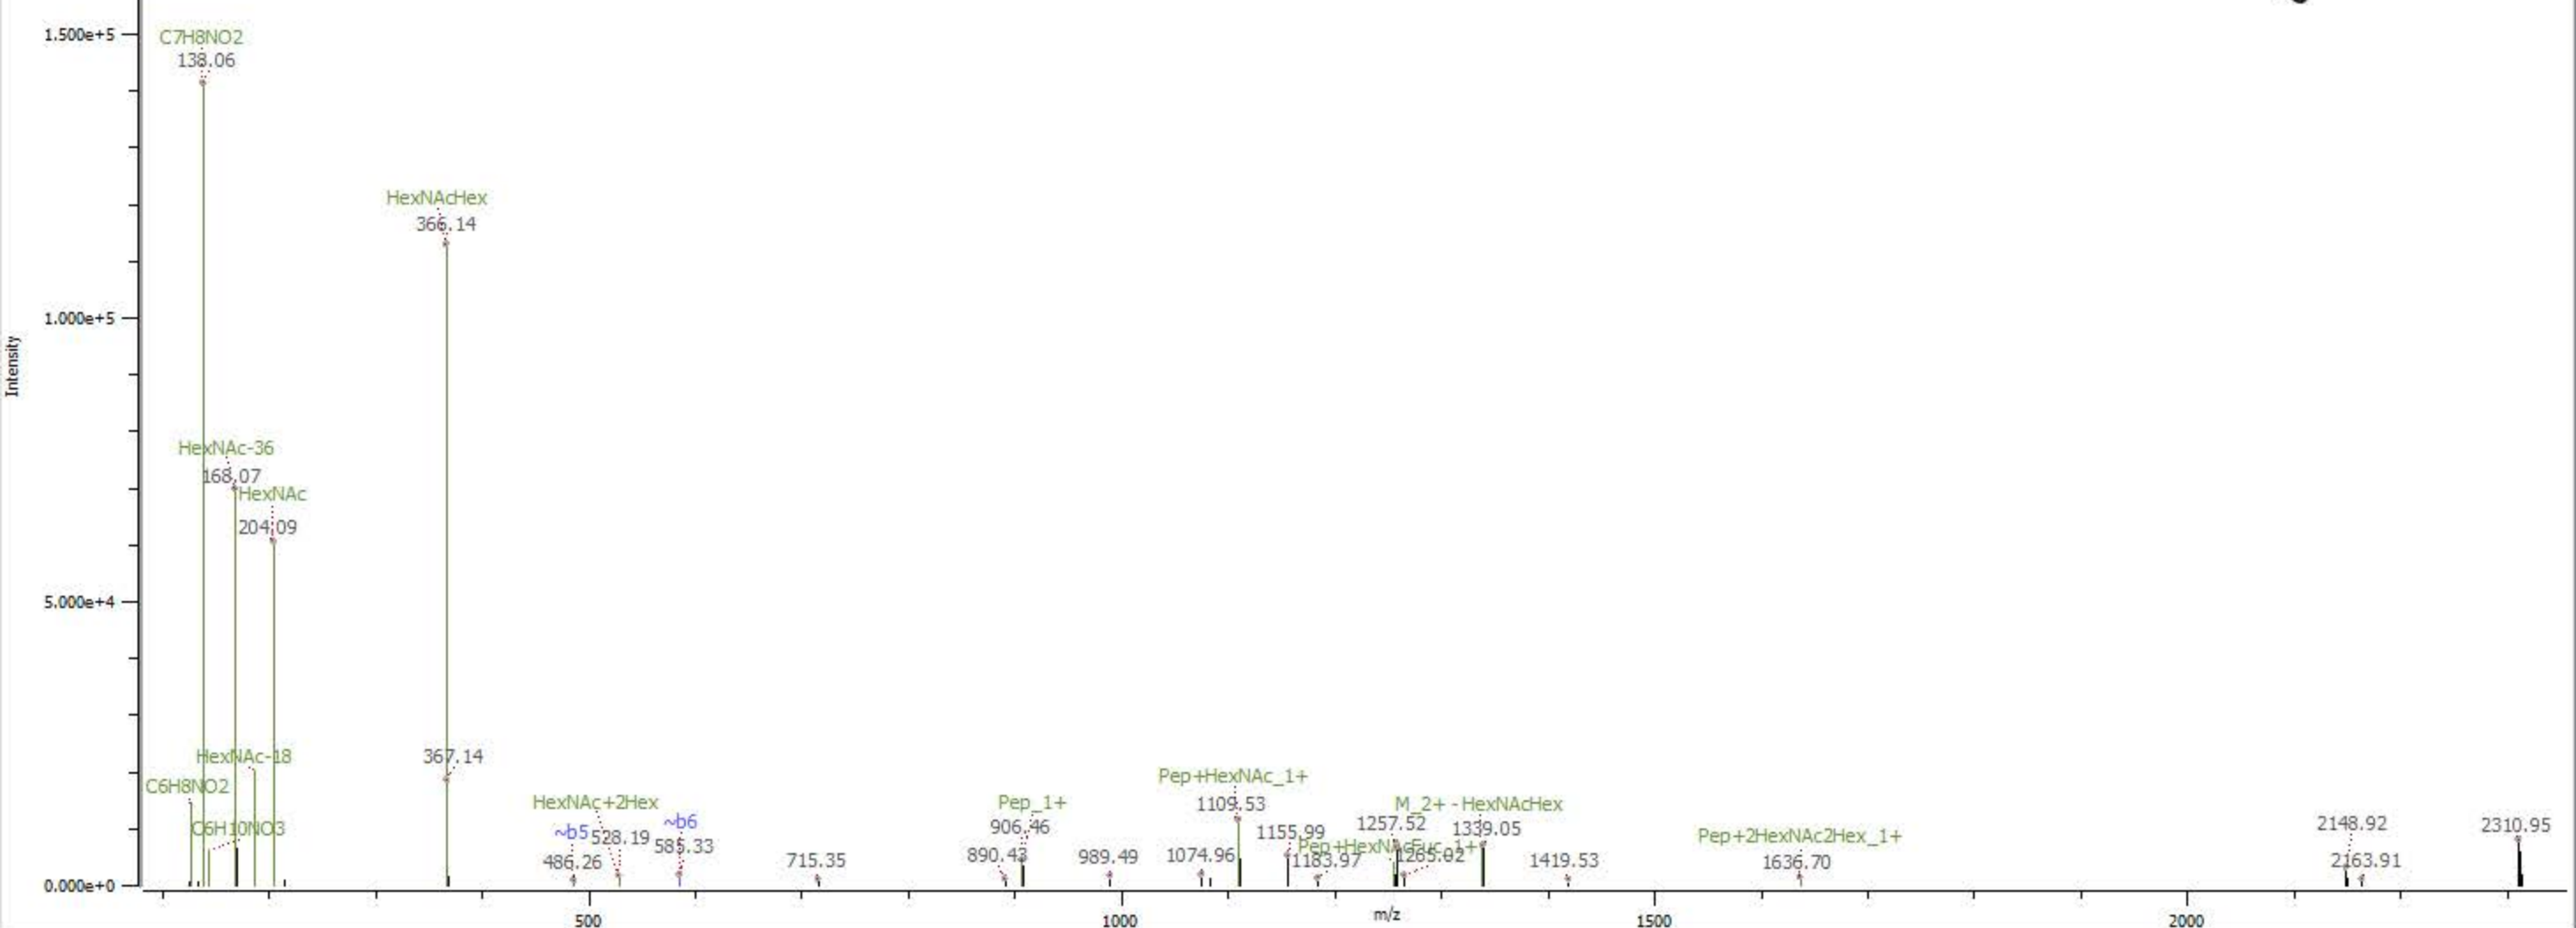



# MS2 F158 #1

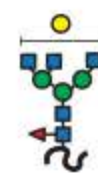

8 7 6,5 4 3 2 1  
**GSKNVSSE**  
 1 2 3 4 5 6 7 8

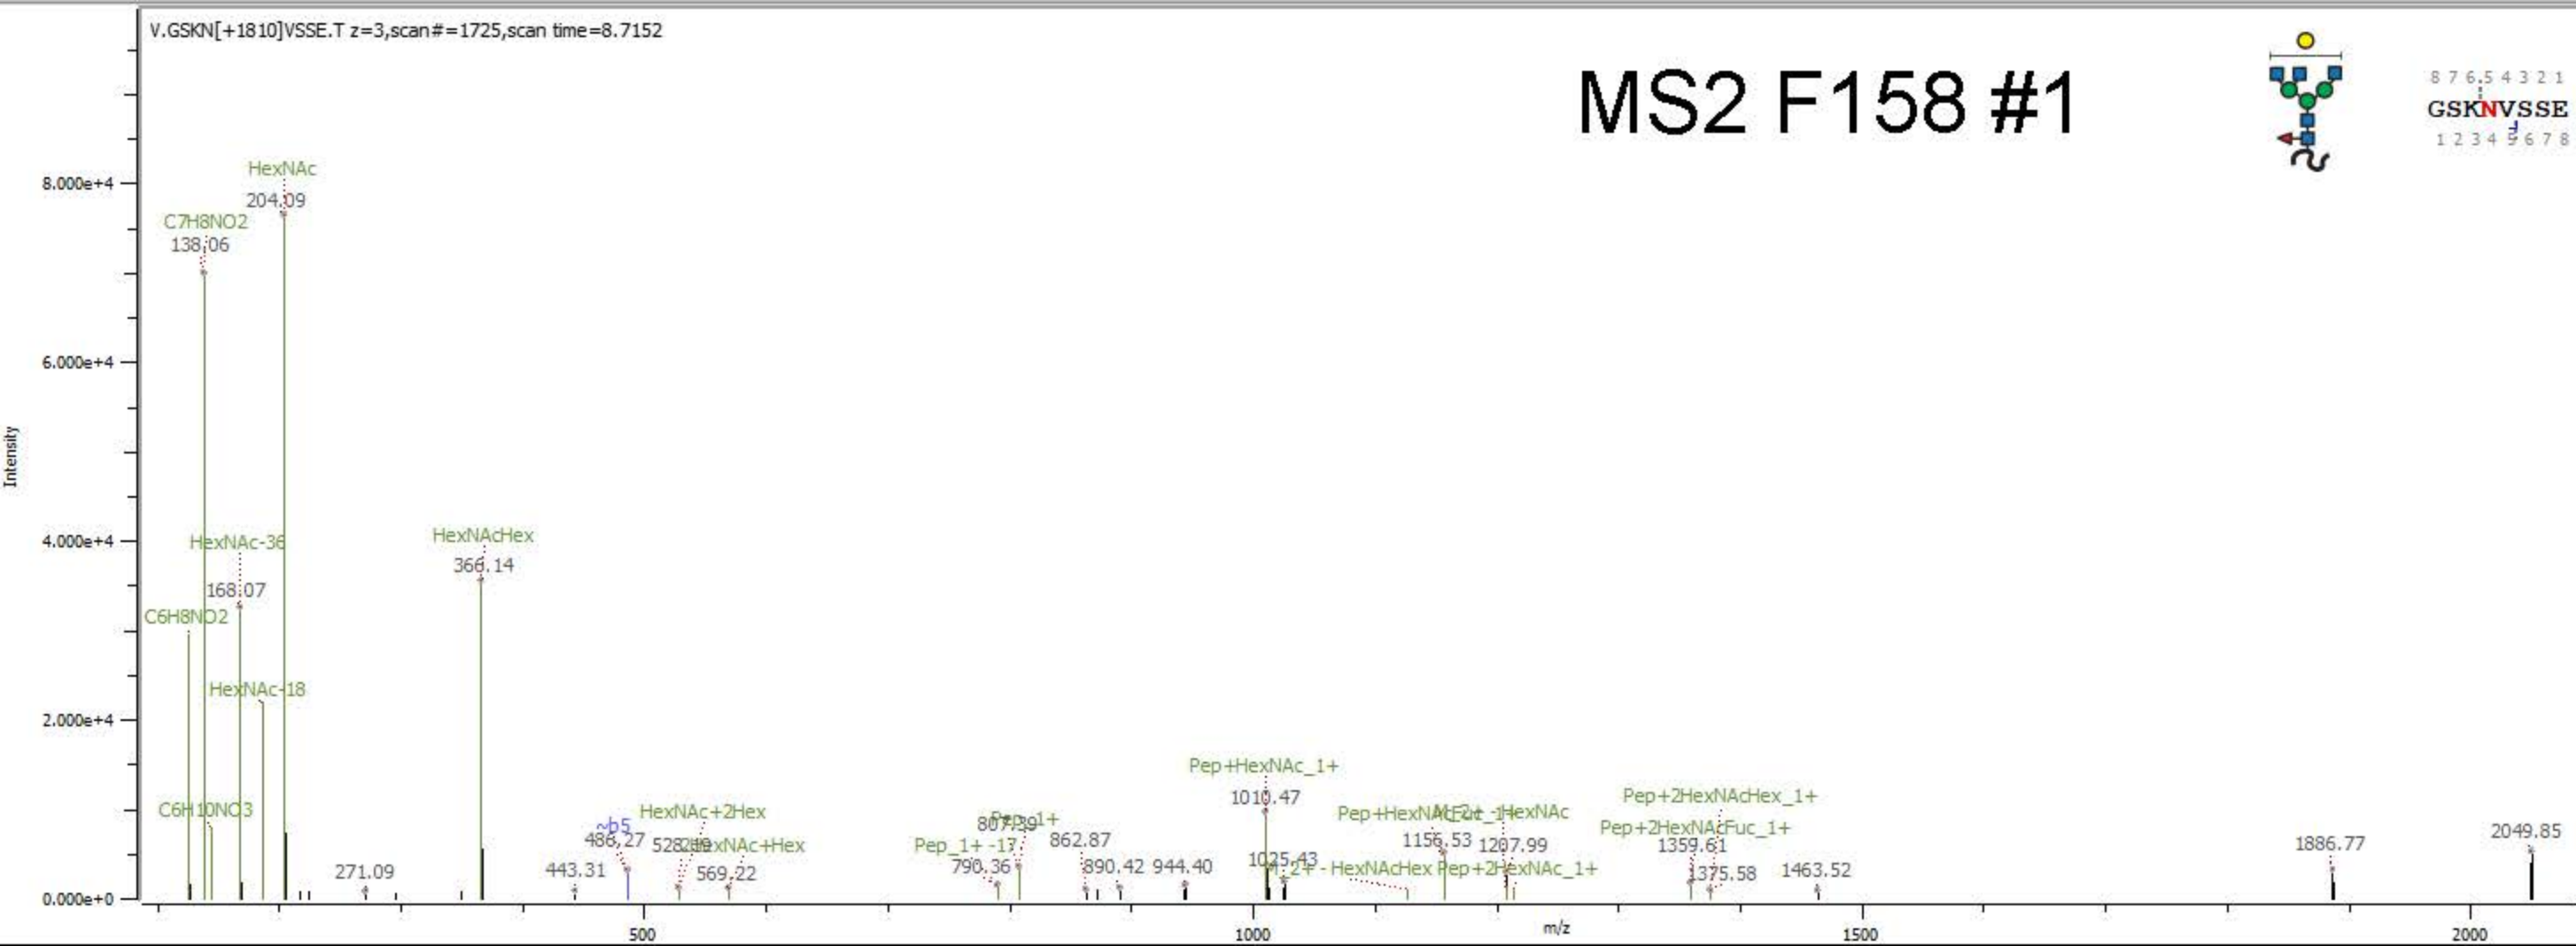

V.GSKN[+1972]VSSE.T z=3,scan#=1722,scan time=8.7043

# MS2 F158 #2

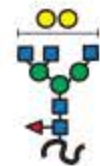

8 7 6 5 4 3 2 1  
GSKNVSSE  
1 2 3 4 5 6 7 8

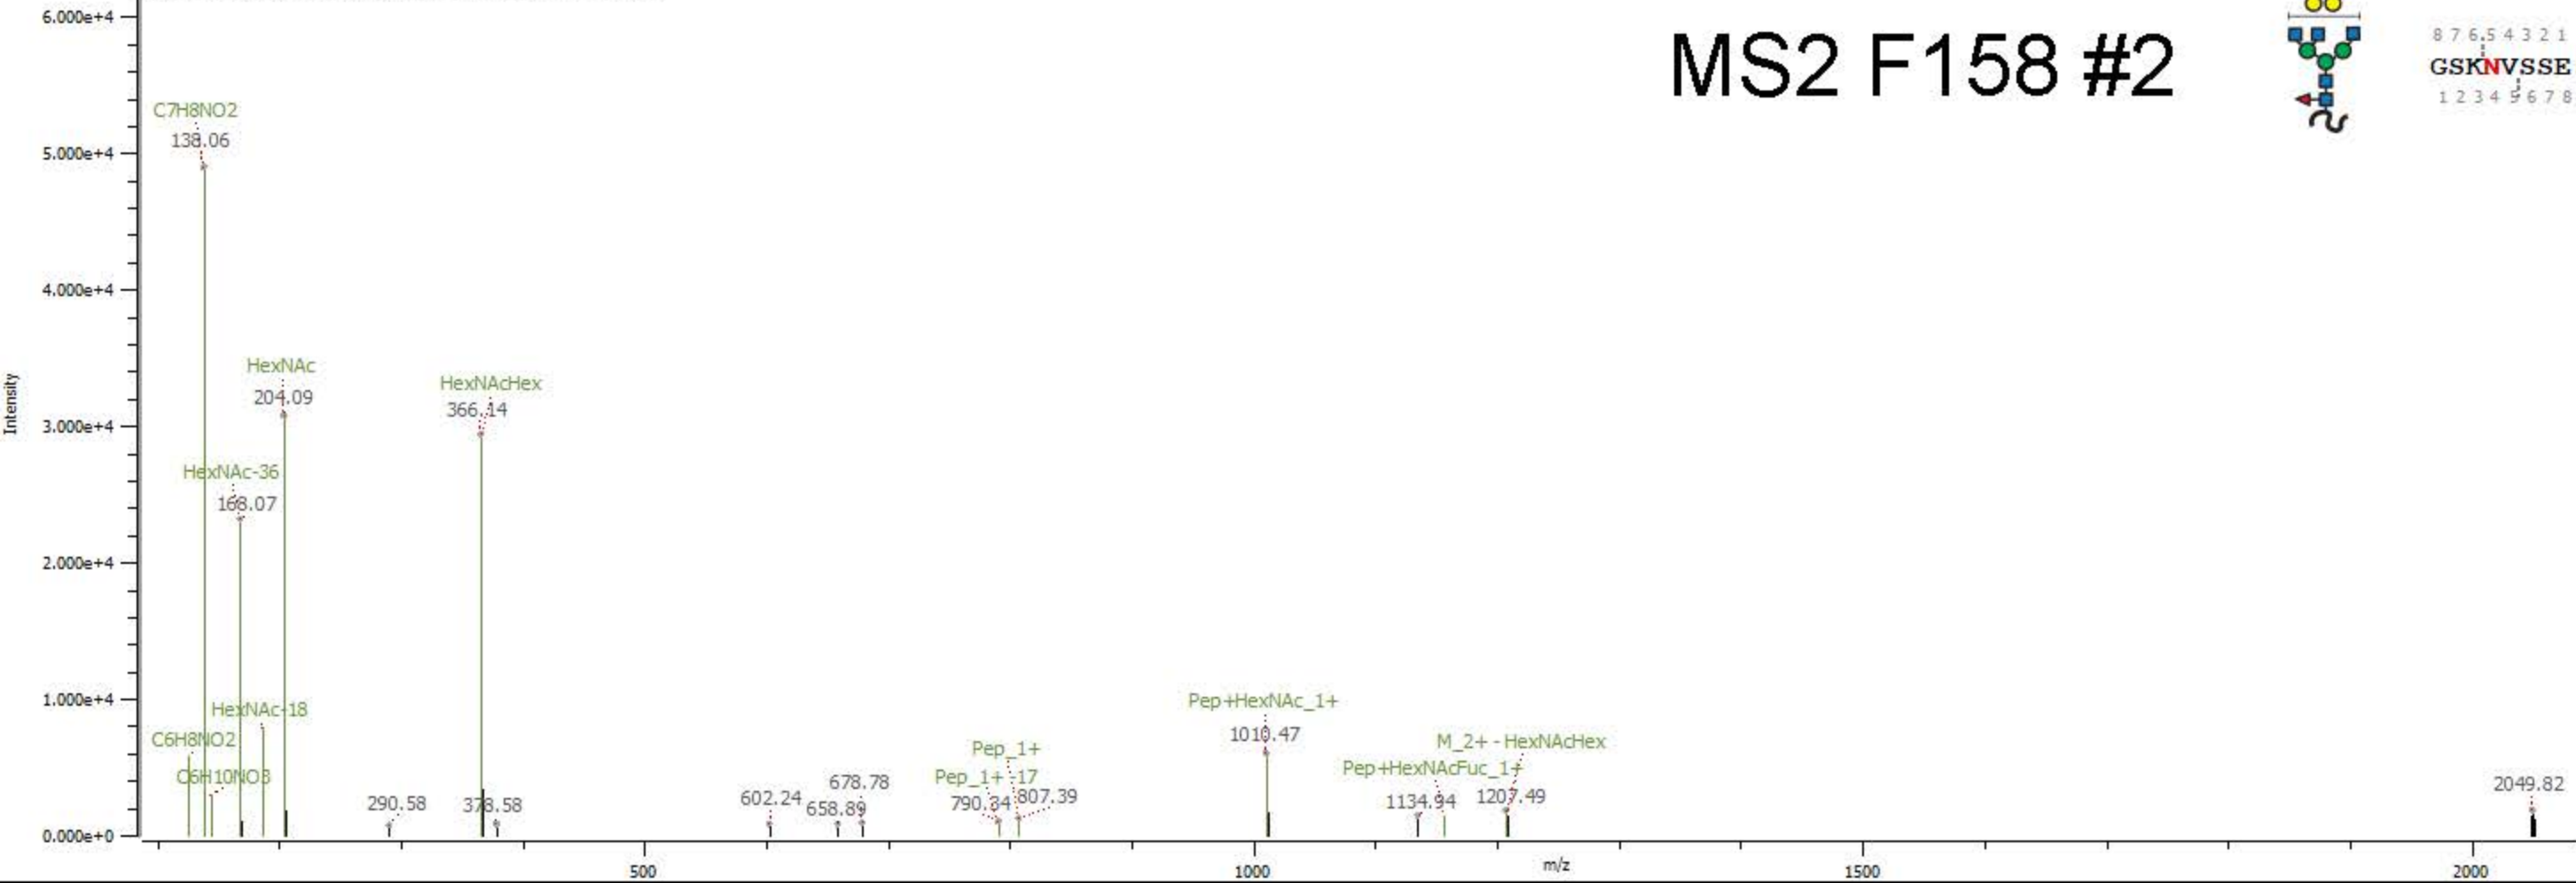

V.GSKN[+1648]VSSE.T z=3,scan#=1730,scan time=8.7345

# MS2 F158 #3

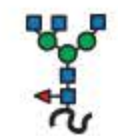

8 7 6,5 4 3 2 1  
GSKNVSSE  
1 2 3 4 5 6 7 8

Intensity

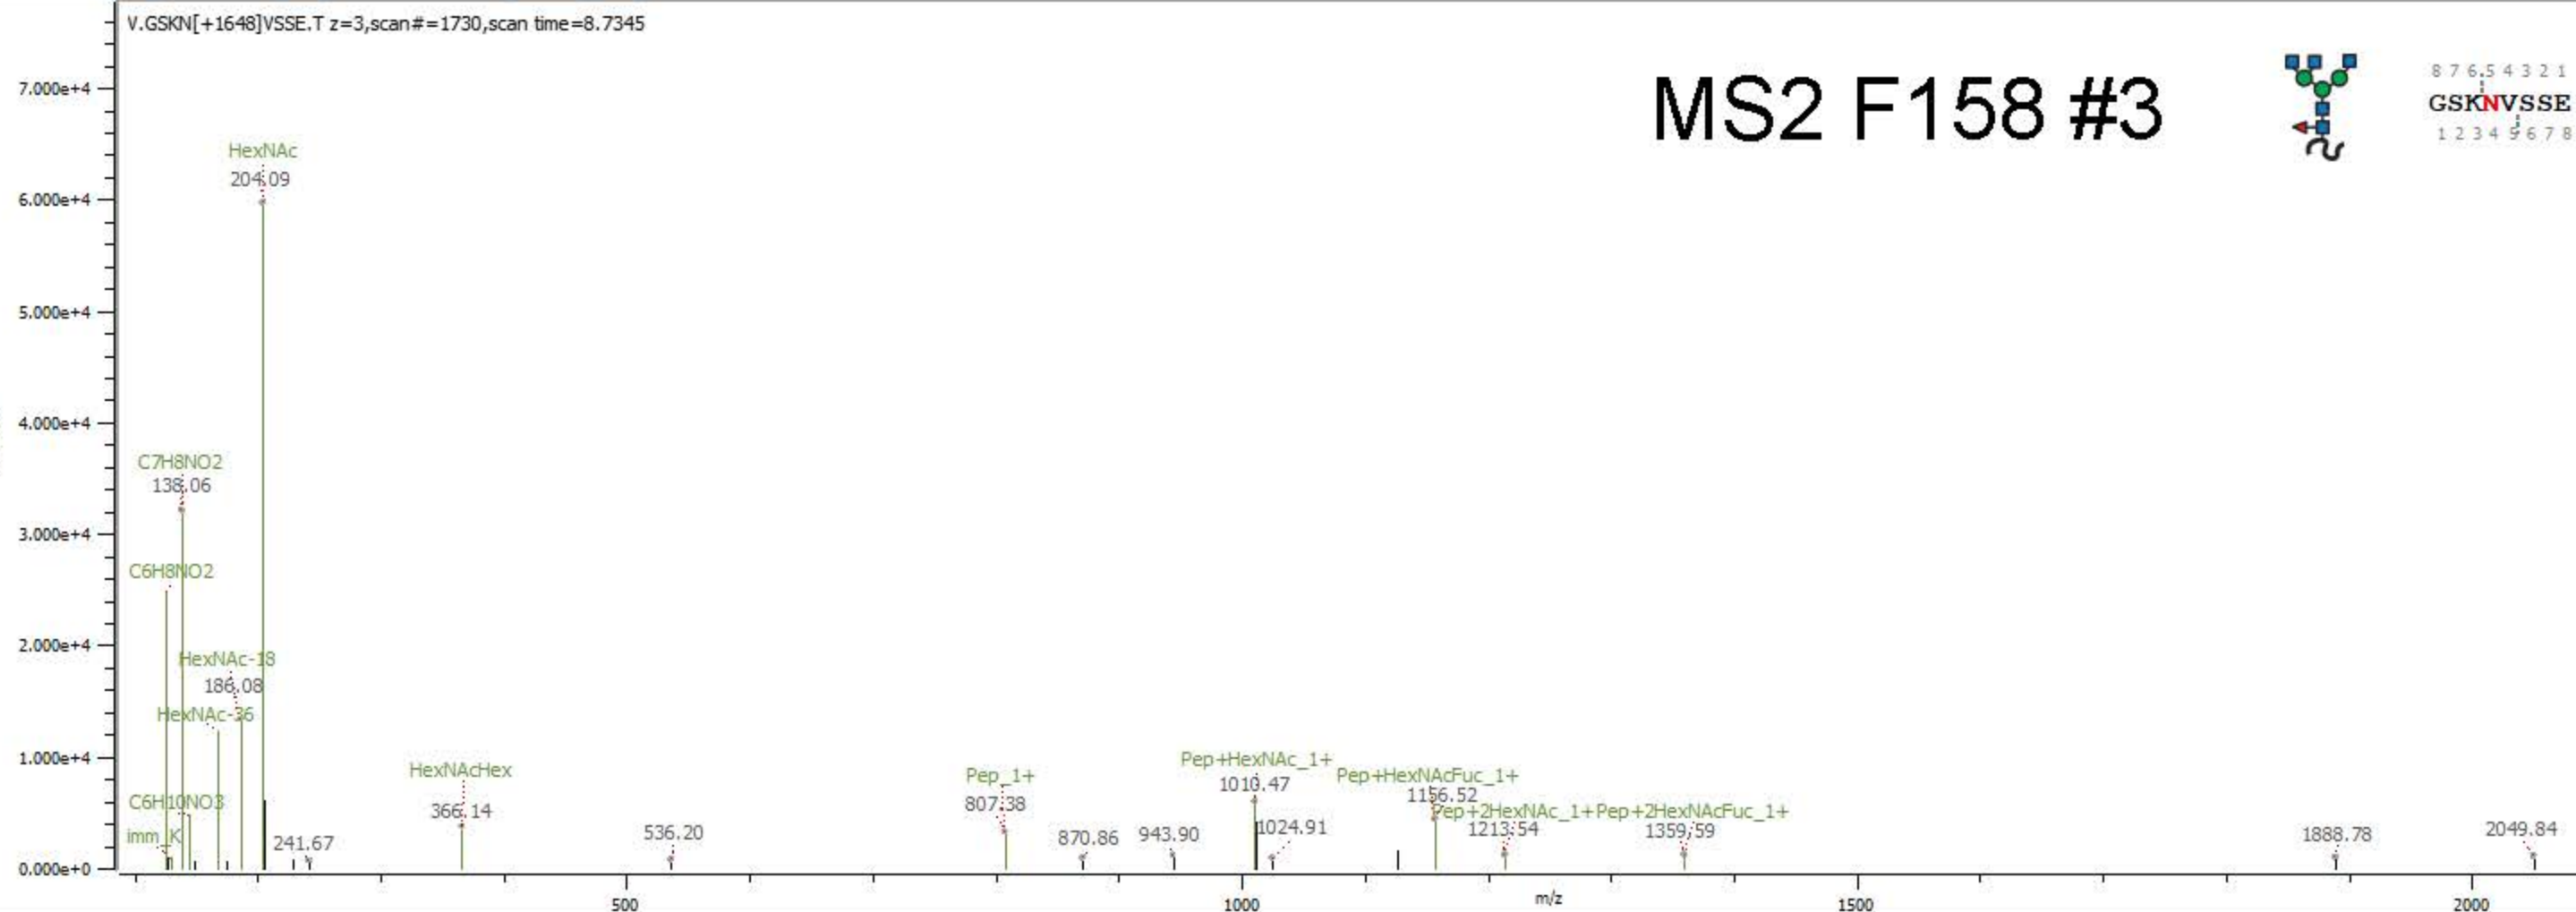

Supplement: mmc1.pdf [file mmc1.pdf]
